# Supplementary material for: A role for BELLRINGER in cell wall development is supported by loss-of-function phenotypes
Source: Springer Nature journal article supplement (doi:10.1186/1471-2229-12-212), 2012-01-01
Supplement: 12870_2012_1177_MOESM1_ESM.pdf [file 12870_2012_1177_MOESM1_ESM.pdf]

Genes changed in expression in BLR-OX in the same direction in all 3 replicates with an average of >1.5-fold change, arranged in order of spot confidence

| SPOTNUMBER | BLOCK | NAME                                                                                                                                                                                                                                                                                                                                      | AG ID     | BLR-OX (1) | Co-0 (1)   | BLR-OX (2) | Co-0 (2) | BLR-OX (3) | Co-0 (3)  | Mean Ratio (BLR-OX:Co-0) | Spot Confidence |
|------------|-------|-------------------------------------------------------------------------------------------------------------------------------------------------------------------------------------------------------------------------------------------------------------------------------------------------------------------------------------------|-----------|------------|------------|------------|----------|------------|-----------|--------------------------|-----------------|
| 3912       | 7     | expressed protein similar to hypothetical protein GB:CA80917.Gi:7267605 from [Arabidopsis thaliana]                                                                                                                                                                                                                                       | At1g01430 | 1787.80183 | 1147.219   | 1552.76854 | 1034.998 | 2896.35392 | 1655.476  | 1.602733601              | 0.803712        |
| 261        | 1     | trypsin inhibitor, putative similar to SPIP26780 Trypsin inhibitor 2 precursor (MTI-2) [Sinapis alba]                                                                                                                                                                                                                                     | At2g43520 | 2623.64804 | 1356.269   | 2447.05036 | 1903.594 | 1752.37643 | 1232.123  | 1.547397015              | 0.778414        |
| 13777      | 22    | expressed protein weak similarity to SPIP35809 Phosphatidylcholine transfer protein (PC-TP) [Rattus norvegicus]                                                                                                                                                                                                                           | At1g64720 | 5778.65146 | 4729.678   | 3573.64263 | 2901.194 | 5432.67396 | 2605.493  | 1.512884545              | 0.76076         |
| 143        | 1     | band 7 family protein strong similarity to hypersensitive-induced response protein [Zea mays] Gi:7716466; contains Pfam profile PF01145: SPFH domain / Band 7 family                                                                                                                                                                      | At1g69840 | 934.878854 | 463.826    | 433.947088 | 365.051  | 1183.55169 | 682.818   | 1.645881681              | 0.743728        |
| 5783       | 9     | expressed protein similar to unknown protein [Pisum sativum]                                                                                                                                                                                                                                                                              | At5g220   | 789.76987  | 559.846    | 560.420118 | 483.709  | 888.793804 | 460.651   | 1.501018393              | 0.736992        |
| 247        | 1     | thioredoxin family protein contains Pfam profile: PF00085 Thioredoxin; similar to ESTs gJ46281, gb R83933, gb N65879, emb F14466, gb N96726, gb AA042340, and emb Z18150                                                                                                                                                                  | At1g08570 | 1353.88436 | 662.757    | 1128.70825 | 799.401  | 936.390775 | 737.109   | 1.575035001              | 0.735816        |
| 11720      | 19    | UDP-glucose transferase (UGT5752) similar to UDP-glucose:indole-3-acetate beta-D-glucosyltransferase [Arabidopsis thaliana]; identical to cDNA UDP-glucosyltransferase (UGT75B2) Gi:13661274                                                                                                                                              | At1g05560 | 985.290944 | 765.769    | 852.45289  | 673.083  | 2681.85157 | 861.069   | 1.889242905              | 0.72891         |
| 23208      | 36    | MER1-5 protein (MER1-5) / endo-xyloglucan transferase / xyloglucan endo-1,4-beta-D-glucanase (SENA) identical to endo-xyloglucan transferase gi:944810, SPIP24806 MER1-5 protein precursor (Endo-xyloglucan transferase) [Xyloglucan endo-1,4-beta-D-glucanase] [Arabidopsis thaliana]                                                    | At4g30270 | 1472.93189 | 555.304    | 1890.03039 | 564.614  | 3446.82975 | 447.573   | 4.567020224              | 0.72864         |
| 29856      | 46    | expressed protein                                                                                                                                                                                                                                                                                                                         | At5g56550 | 953.785661 | 467.624    | 805.732384 | 579.965  | 2182.90695 | 1098.222  | 1.805531167              | 0.728376        |
| 13384      | 21    | alkaline alpha galactosidase, putative similar to alkaline alpha galactosidase II [Cucumis melo] Gi:29838631; contains Pfam profile PF05691: Raffinose synthase or seed imbibition protein Sip1                                                                                                                                           | At3g57520 | 1275.32972 | 747.599    | 1160.01461 | 514.271  | 1283.00576 | 1123.011  | 1.701339916              | 0.7209          |
| 23377      | 36    | ripening-responsive protein, putative similar to ripening regulated protein DDTFR18 [Lycopersicon esculentum] Gi:12231296; contains Pfam profile PF01554: Uncharacterized membrane protein family                                                                                                                                         | At5g65380 | 892.259659 | 638.703    | 891.633662 | 729.42   | 626.72106  | 308.31    | 1.55071222               | 0.72036         |
| 251        | 1     | yippee family protein similar to mgd-1 [Mus musculus] Gi:10441648, Yippee protein [Drosophila melanogaster] Gi:5713279; contains Pfam profile PF03226: Yippee putative zinc-binding protein                                                                                                                                               | At2g40110 | 769.61837  | 374.016    | 603.829645 | 533.64   | 937.675344 | 601.399   | 1.582800619              | 0.71728         |
| 3038       | 5     | 26S proteasome regulatory subunit, putative (RPN9) similar to 26S proteasome subunit p40.5 [Homo sapiens] gi 3618343 db BAAS33214                                                                                                                                                                                                         | At4g19006 | 1072.05668 | 623.653    | 803.869745 | 572.546  | 1417.85042 | 565.897   | 1.876171324              | 0.71253         |
| 11064      | 18    | methylcrotonyl-CoA carboxylase alpha chain, mitochondrial / 3-methylcrotonyl-CoA carboxylase 1 (MCCA) nearly identical to SP Q42523 Methylcrotonyl-CoA carboxylase alpha chain, mitochondrial precursor (EC 6.4.1.4) (3-Methylcrotonyl-CoA carboxylase 1) (MCCase alpha subunit) (3-methylcrotonyl-CoA:carbon diox                        | At1g03090 | 110.623123 | 429.567    | 700.803189 | 352      | 3579.37332 | 1203.481  | 2.361654827              | 0.712356        |
| 18415      | 29    | sinapoylglucose:malate sinapoyltransferase (SNG1) similar to serine carboxypeptidase 1 precursor (SP:P37890) [Oryza sativa]; contains Pfam profile PF00450: Serine carboxypeptidase; identical to cDNA sinapoylglucose:malate sinapoyltransferase (SNG1) Gi:8699618                                                                       | At2g22990 | 4085.189   | 2704       | 2941.75071 | 1695.299 | 4667.97208 | 1862.184  | 1.917584609              | 0.711822        |
| 767        | 2     | expressed protein                                                                                                                                                                                                                                                                                                                         | At1g50010 | 9712.49188 | 4642.268   | 7498.23309 | 6179.574 | 3226.09639 | 5026.816  | 1.732003388              | 0.70345         |
| 2815       | 5     | sinapoylglucose:malate sinapoyltransferase (SNG1) similar to serine carboxypeptidase 1 precursor (SP:P37890) [Oryza sativa]; contains Pfam profile PF00450: Serine carboxypeptidase; identical to cDNA sinapoylglucose:malate sinapoyltransferase (SNG1) Gi:8699618                                                                       | At2g22990 | 5398.73235 | 3458.197   | 3257.97392 | 2537.054 | 3825.25791 | 2175.012  | 1.534675553              | 0.693696        |
| 4203       | 7     | serine carboxypeptidase S10 family protein contains Pfam profile: PF00450 serine carboxypeptidase; similar to serine carboxypeptidase 1 precursor (SP:P37890) [Oryza sativa]                                                                                                                                                              | At3g12230 | 2776.2309  | 1719.291   | 1840.89122 | 1297.522 | 2964.02162 | 1506.091  | 1.667183616              | 0.68904         |
| 13379      | 21    | stictosidine synthase family protein similar to stictosidine synthase [Rauvolfia serpentina][SP15324]                                                                                                                                                                                                                                     | At3g57020 | 1033.37886 | 687.06     | 607.430641 | 503.934  | 1121.54599 | 422.16    | 1.788707045              | 0.68904         |
| 18180      | 28    | expressed protein similar to hypothetical protein GB:CA80917.Gi:7267605 from [Arabidopsis thaliana]                                                                                                                                                                                                                                       | At1g01431 | 3364.08697 | 1830.95    | 2369.03522 | 1743.529 | 3672.4817  | 1682.677  | 1.903980553              | 0.688344        |
| 14032      | 22    | trypsin inhibitor, putative similar to SPIP26780 Trypsin inhibitor 2 precursor (MTI-2) [Sinapis alba]                                                                                                                                                                                                                                     | At2g43521 | 3465.72434 | 1873.31    | 2429.35368 | 1790.431 | 3767.31092 | 1721.287  | 1.908170305              | 0.68714         |
| 24315      | 38    | expressed protein weak similarity to SPIP35809 Phosphatidylcholine transfer protein (PC-TP) [Rattus norvegicus]                                                                                                                                                                                                                           | At1g74960 | 3567.36171 | 1915.67    | 2489.67215 | 1837.332 | 3862.14015 | 1759.898  | 1.912360057              | 0.681304        |
| 19018      | 30    | zinc finger (B-box type) family protein similar to zinc finger protein Gi:3618316 from [Oryza sativa]                                                                                                                                                                                                                                     | At1g78600 | 1324.91289 | 1124.333   | 1727.28459 | 1456.649 | 1702.24939 | 675.64    | 1.627884801              | 0.68034         |
| 14659      | 23    | asparagine synthetase 1 [glutamine-hydrolyzing] / glutamine-dependent asparagine synthetase 1 (ASN1) identical to SPI P49078 Asparagine synthetase [glutamine-hydrolyzing] (EC 6.3.5.4) (Glutamine- dependent asparagine synthetase) [Arabidopsis thaliana]                                                                               | At3g47340 | 1266.23944 | 777.959    | 1643.81796 | 1443.662 | 3379.26308 | 799.412   | 2.331157781              | 0.67983         |
| 11918      | 19    | ABC transporter family protein similar to PDR5-like ABC transporter Gi:1514643 [Spirodela polytricha]                                                                                                                                                                                                                                     | At2g26910 | 1151.06161 | 957.544    | 1331.99403 | 960.898  | 1786.05976 | 913.899   | 1.514208158              | 0.679272        |
| 2796       | 5     | UDP-glucuronosyl/UDP-glucosyl transferase family protein contains Pfam profile: PF00201 UDP-glucuronosyl and UDP-glucosyl transferase                                                                                                                                                                                                     | At2g15490 | 656.863125 | 339.012    | 416.069391 | 246.699  | 667.222    | 767.00909 | 1.67265894               | 0.679252        |
| 28144      | 45    | polyubiquitin (UBQ4) identical to Gi:17677                                                                                                                                                                                                                                                                                                | At5g20620 | 10704.5534 | 7731.081   | 9451.38114 | 7623.174 | 10895.6897 | 5629.167  | 1.513311976              | 0.689249        |
| 27282      | 42    | xyloglucan:xyloglucosyl transferase, putative / xyloglucan endotransglycosylase, putative / endo-xyloglucan transferase, putative similar to endo-xyloglucan transferase Gi:2244732 from [Cossypium hirsutum]                                                                                                                             | At5g65730 | 1070.29724 | 769.445    | 1416.30991 | 780.267  | 1646.2892  | 1065.555  | 1.583721976              | 0.685364        |
| 22655      | 35    | bZIP transcription factor family protein similar to seed storage protein opaque-2[bZIP family]Gi:168428 from Zea mays; contains Pfam profile PF00170: bZIP transcription factor; identical to cDNA bZIP protein BZ02H3 Gi:10954098                                                                                                        | At5g28770 | 763.301483 | 376.854    | 781.707687 | 273.982  | 742.346675 | 668.329   | 1.996447438              | 0.68521         |
| 28563      | 44    | copper transporter 1 (COPT1) nearly identical to SPI Q39065 Copper transporter 1 (COPT1) [Arabidopsis thaliana]                                                                                                                                                                                                                           | At5g59030 | 826.422216 | 702.949    | 812.083521 | 663.591  | 763.877119 | 281.286   | 1.705027132              | 0.663872        |
| 15283      | 24    | expressed protein                                                                                                                                                                                                                                                                                                                         | At3g27770 | 395.281354 | 304.093    | 973.10221  | 696.513  | 1153.14679 | 618.696   | 1.520269932              | 0.66339         |
| 25923      | 40    | chaperone protein dnaJ-related similar to Chaperone protein dnaJ (SP:Q9WVZ3) [Thermotoga maritima]                                                                                                                                                                                                                                        | At5g43260 | 528.72638  | 449.406    | 748.030409 | 561.464  | 754.241823 | 325.448   | 1.608778507              | 0.658416        |
| 22572      | 35    | pectinesterase family protein contains Pfam profile: PF01095 pectinesterase                                                                                                                                                                                                                                                               | At4g33220 | 955.217817 | 691.288    | 721.054807 | 589.872  | 685.08749  | 340.709   | 1.538318815              | 0.657888        |
| 18068      | 28    | alpha-glucosidase 1 (AGLU1) identical to alpha-glucosidase 1 [Arabidopsis thaliana] Gi:2323344                                                                                                                                                                                                                                            | At5g11720 | 1126.01333 | 633.312    | 1204.73069 | 690.89   | 832.977841 | 410.758   | 1.84987238               | 0.657888        |
| 8444       | 13    | importin alpha-1 subunit, putative similar to importin alpha-1 subunit [Karyopherin alpha-1 subunit, KAP alpha] [Arabidopsis thaliana] SWISS-PROT:Q96321                                                                                                                                                                                  | At1g32880 | 1117.83218 | 660.835    | 1114.45882 | 683.742  | 727.509185 | 453.906   | 1.641420208              | 0.65772         |
| 17151      | 27    | zinc finger (CCHH-type) family protein contains Pfam domain, PF00642: Zinc finger C-x8-C-x5-C-x3-H type (and similar) and Pfam domain, PF00023: Ankyrin repeat                                                                                                                                                                            | At2g40140 | 3845.94522 | 1852.075   | 4059.06325 | 2057.915 | 3265.53442 | 1333.214  | 2.166115211              | 0.657443        |
| 21322      | 33    | nodulin family protein similar to nodulin-like protein [Arabidopsis thaliana] Gi:3329368, nodulin-specific protein Nj70 [Lotus japonicus] Gi:3329368                                                                                                                                                                                      | At1g51420 | 2839.33543 | 1674.732   | 2729.70309 | 1659.574 | 3226.09639 | 5026.816  | 1.6527366                | 0.65736         |
| 9639       | 15    | raffinose synthase family protein / seed imbibition protein, putative (din10) similar to seed imbibition protein GB:AAA32975.Gi:167100 from [Hordeum vulgare]; contains nonconsensus AT donor splice site at intron 1; contains Pfam profile PF05691: Raffinose synthase or seed imbibition protein Sip1; identical to cDNA see At5g20250 | At5g20250 | 3425.05727 | 1433.546   | 3228.69654 | 735.179  | 7815.1468  | 5532.069  | 2.731664712              | 0.65736         |
| 13322      | 21    | glycolipid transfer protein-related contains weak similarity to Glycolipid transfer protein (GLTP) (Swiss-Prot:P17403) [Ussu scrofa]                                                                                                                                                                                                      | At3g21260 | 877.663223 | 512.159    | 897.580085 | 682.184  | 858.984687 | 396.788   | 1.7161414697             | 0.6561          |
| 6014       | 10    | wound-responsive protein, putative similar to wound-responsive protein 14.05 (Gi:16506638) [Castanea sativa]                                                                                                                                                                                                                              | At1g77310 | 4025.0686  | 2583.169   | 3413.43337 | 2548.594 | 3432.41495 | 1992.317  | 1.540120888              | 0.653883        |
| 7854       | 13    | 12-oxophytodienoate reductase, putative similar to OPR1 [Gi:3882355] and OPR2 [Gi:3882356]                                                                                                                                                                                                                                                | At1g18020 | 2821.39995 | 1819.391   | 1602.53398 | 1018.547 | 2975.52294 | 1339.871  | 1.781614984              | 0.64989         |
| 5043       | 8     | homeodomain protein (BELLRINGER) several homeodomain proteins;                                                                                                                                                                                                                                                                            | At5g02030 | 1997.31154 | 633.566    | 2116.11884 | 540.4    | 3408.33392 | 946.186   | 3.556837127              | 0.649194        |
| 5461       | 9     | trypsin inhibitor, putative similar to SPIP26780 Trypsin inhibitor 2 precursor (MTI-2) [Sinapis alba]                                                                                                                                                                                                                                     | At2g43510 | 616.755282 | 425.664    | 658.437313 | 505.848  | 1171.86273 | 200.919   | 2.861029648              | 0.648           |
| 26220      | 41    | CBL-interacting protein kinase 3 (CIKP3) identical to CBL-interacting protein kinase 3 [Arabidopsis thaliana] gi 9280638 gb AAF86507                                                                                                                                                                                                      | At2g26980 | 802.937645 | 449.692    | 560.38347  | 322.618  | 1524.53354 | 814.292   | 1.798245101              | 0.64792         |
| 3836       | 6     | glycosyl hydrolase family 3 protein                                                                                                                                                                                                                                                                                                       | At5g49360 | 2157.03913 | 629.007    | 1057.0803  | 381.654  | 3101.16737 | 1940.799  | 2.598964415              | 0.645606        |
| 1931       | 3     | asparagine synthetase 2 (ASN2) identical to asparagine synthetase (ASN2) [Arabidopsis thaliana] Gi:3859536                                                                                                                                                                                                                                | At5g65010 | 2723.47645 | 1608.764   | 2191.69992 | 1841.95  | 7634.68665 | 2981.252  | 1.814559866              | 0.64328         |
| 7040       | 27    | UbiE/COQ5 methyltransferase family protein low similarity to SPI Q05197 Phosphatidylethanolamine N-methyltransferase (EC 2.1.1.17) [Rhodospseudomonas sphaeroides] [Rhodobacter sphaeroides]; contains Pfam profile PF01209: methyltransferase, UbiE/COQ5 family                                                                          | At1g69526 | 1608.70751 | 708.456    | 1481.00356 | 1057.31  | 917.274826 | 647.485   | 1.696041525              | 0.642936        |
| 29962      | 45    | serine carboxypeptidase S10 family protein similar to serine carboxypeptidase 1 precursor (SP:P37890) [Oryza sativa]                                                                                                                                                                                                                      | At2g20000 | 3099.55744 | 2281.431   | 2983.53886 | 2045.557 | 2347.01627 | 1084.925  | 1.642392258              | 0.642936        |
| 29215      | 45    | xyloglucan:xyloglucosyl transferase / xyloglucan endotransglycosylase / endo-xyloglucan transferase (TCH4) identical to xyloglucan endotransglycosylase TCH4 protein Gi:886116                                                                                                                                                            | At5g75660 | 486.388482 | 186.933    | 705.078176 | 250.232  | 1814.01923 | 1263.888  | 2.284969009              | 0.642005        |
| 9042       | 14    | pyridoxamine 5-phosphate oxidase-related contains weak similarity to Pyridoxamine 5-phosphate oxidase (EC 1.4.3.5) (PNP/PMP oxidase) (PNPOx). (Swiss-Prot:P28225) [Shigella flexneri]                                                                                                                                                     | At5g49970 | 868.588983 | 764.514    | 677.917745 | 596.381  | 848.37617  | 254.988   | 1.866657792              | 0.639821        |
| 27738      | 43    | glutathione S-transferase-related contains weak hit to Pfam profile PF00043: Glutathione S-transferase, C-terminal domain                                                                                                                                                                                                                 | At4g19880 | 1322.62508 | 1030.956   | 1816.56857 | 1602.899 | 1337.73086 | 601.011   | 1.547338063              | 0.638664        |
| 25005      | 39    | cytochrome P450, putative similar to GB:Q05407 from [Catharanthus roseus]                                                                                                                                                                                                                                                                 | At3g14690 | 3411.44163 | 2466.579   | 3114.7228  | 2416.425 | 3480.86979 | 1371.652  | 1.736588841              | 0.63648         |
| 23654      | 37    | ACT domain-containing protein contains Pfam ACT domain PF01842                                                                                                                                                                                                                                                                            | At2g39570 | 547.189315 | 311.386    | 586.720134 | 266.541  | 557.954367 | 317.346   | 1.905565778              | 0.63597         |
| 25128      | 39    | monoxygenase, putative (MO1) similar to Gi:3426062                                                                                                                                                                                                                                                                                        | At4g15760 | 1479.21241 | 864.126    | 2302.10869 | 1345.038 | 1117.17474 | 743.609   | 1.641908964              | 0.63495         |
| 7793       | 12    | thioesterase family protein contains Pfam profile PF03061: thioesterase family protein                                                                                                                                                                                                                                                    | At1g35250 | 1424.72633 | 950.977    | 1076.10663 | 658.437  | 993.025202 | 699.994   | 1.517041917              | 0.63495         |
| 5550       | 9     | nitrilase 2 (NIT2) identical to SPI P32962 Nitrilase 2 (EC 3.5.5.1) [Arabidopsis thaliana]                                                                                                                                                                                                                                                | At3g44300 | 6358.29049 | 5388.119   | 5582.12357 | 4930.994 | 5720.70807 | 2614.229  | 1.502336489              | 0.63468         |
| 13062      | 21    | expressed protein similar to TollB protein precursor (SP:Q9ZDM5) [Rickettsia prowazekii]; ESTs gb N96028, gb F14286, gb T20680, gb F14443, gb AA657300 and gb N65244 come from this gene                                                                                                                                                  | At1g21680 | 2892.84943 | 1900.774   | 1354.90178 | 956.867  | 2643.44028 | 1226.645  | 1.697642008              | 0.63427         |
| 29962      | 47    | expressed protein contains Pfam profile PF04749: Protein of unknown function, DUF614                                                                                                                                                                                                                                                      | At1g25275 | 5657.93926 | 2326.916</ |            |          |            |           |                          |                 |

|       |                                                                                                                                                                                                                                                                                                                                                                                                          |             |             |          |            |          |              |          |              |           |
|-------|----------------------------------------------------------------------------------------------------------------------------------------------------------------------------------------------------------------------------------------------------------------------------------------------------------------------------------------------------------------------------------------------------------|-------------|-------------|----------|------------|----------|--------------|----------|--------------|-----------|
| 23616 | 37 serine carboxypeptidase S10 family protein similar to serine carboxypeptidase I precursor (SP:P37890) [Oryza sativa]                                                                                                                                                                                                                                                                                  | At2g23010   | 2219.22613  | 1714.013 | 1558.14294 | 1089.417 | 1655.6482    | 776.794  | 1.618798308  | 0.54675   |
| 17720 | 28 kelch repeat-containing F-box family protein similar to SP QBER30 Kelch-related protein 1 (Sarcosin) [Rattus norvegicus]; contains Pfam profiles PF01344: Kelch motif, PF00646: F-box domain                                                                                                                                                                                                          | At1g80440   | 1633.70874  | 799.598  | 1404.23224 | 695.271  | 1358.92933   | 930.799  | 1.840937714  | 0.543576  |
| 20757 | 32 beta-galactosidase, putative / lactase, putative similar to beta-galactosidase precursor GI:3869280 from [Carica papaya]                                                                                                                                                                                                                                                                              | At5g56870   | 1105.20055  | 282.977  | 625.728798 | 158.689  | 797.939839   | 353.94   | 3.367727681  | 0.54264   |
| 9464  | 15 broad-spectrum mildew resistance RPW8 family protein contains Pfam PF05659: Arabidopsis broad-spectrum mildew resistance protein RPW8                                                                                                                                                                                                                                                                 | At3g50480   | 360.167339  | 287.909  | 339.943569 | 213.493  | 1154.47672   | 619.095  | 1.569350423  | 0.539616  |
| 7603  | 12 no apical meristem (NAM) family protein (RD26) contains Pfam PF02365: No apical meristem (NAM) domain; Arabidopsis thaliana nap gene, PID:e1234813; identical to cDNA RD26 mRNA for NAM-like protein GI:15375403                                                                                                                                                                                      | At4g27410   | 481.018166  | 226.394  | 403.5362   | 241.324  | 1187.5456    | 787.157  | 1.768507455  | 0.537516  |
| 19112 | 30 autophagy 8e (APG8e) identical to autophagy 8e [Arabidopsis thaliana] GI:19912159; contains Pfam profile PF02991: Microtubule associated protein 1A/1B, light chain 3                                                                                                                                                                                                                                 | At2g45170   | 3948.08497  | 1914.459 | 3520.42119 | 1728.483 | 3589.19418   | 2378.754 | 1.869297057  | 0.536844  |
| 7090  | 11 acetyl-CoA C-acyltransferase, putative / 3-ketoacyl-CoA thiolase, putative strong similarity to Acetoacetyl-coenzyme A thiolase (E.C. 2.3.1.9) [Raphanus sativus] GI:1542941; contains InterPro accession IPR002155: Thiolase                                                                                                                                                                         | At5g48230   | 9105.54671  | 6615.708 | 9928.00169 | 6688.256 | 9930.33164   | 5592.62  | 1.508959201  | 0.536256  |
| 5078  | 6 DnaJ heat shock N-terminal domain-containing protein similar to SP P30725 Chaperone protein dnaJ Clostridium acetobutylicum; contains Pfam profile PF00226: DnaJ domain                                                                                                                                                                                                                                | At5g16650   | 920.516655  | 549.733  | 841.125712 | 496.199  | 2114.84954   | 1656.558 | 1.548719559  | 0.535952  |
| 8825  | 2 metalloprotease family protein similar to metalloprotease putative / endo-xyloglucan transferase, putative / endo-xyloglucan transferase, putative (XTR4) identical to N-terminal partial sequence of xyloglucan endotransglycosylase-related protein XTR4 GI:1244754 from [Arabidopsis thaliana]; similar to endoxyloglucan transferase [Arabidopsis thaliana] GI:1244754 from [Arabidopsis thaliana] | At1g19510   | 1596.99575  | 916.524  | 2537.63241 | 1541.72  | 4948.5391    | 753.343  | 3.215255964  | 0.485289  |
| 16210 | 25 CER1 protein, putative (WAX2) similar to maize glossy1 homolog GI:2213643 from [Oryza sativa]; contains Pfam profile PF01598: Sterol desaturase                                                                                                                                                                                                                                                       | At5g7800    | 589.737919  | 436.21   | 476.88498  | 336.251  | 395.676021   | 206.007  | 1.599866527  | 0.525888  |
| 16458 | 26 auxin-responsive protein, putative similar to small auxin-up regulated protein SAUR (GI:3043536) [Raphanus sativus]                                                                                                                                                                                                                                                                                   | At2g21210   | 3059.90993  | 2400.28  | 2294.50995 | 1361.066 | 5561.07103   | 2381.446 | 1.765265773  | 0.524477  |
| 19045 | 30 hypothetical protein                                                                                                                                                                                                                                                                                                                                                                                  | At2g18200   | 485.523199  | 332.983  | 503.782508 | 449.31   | 399.989533   | 206.195  | 1.506399487  | 0.522144  |
| 10575 | 17 CBS domain-containing protein low similarity to SP Q9MYP4 5'-AMP-activated protein kinase, gamma-3 subunit (AMPK gamma-3 chain) (AMPK gamma3) [Sus scrofa]; contains Pfam profile PF00571: CBS domain                                                                                                                                                                                                 | At1g80090   | 608.623334  | 410.415  | 485.739288 | 310.224  | 716.525401   | 428.664  | 1.573415737  | 0.521264  |
| 1856  | 3 NAD-dependent epimerase/dehydratase family protein similar to sugar epimerase BimG from Streptomyces verticillus GI:9937230; contains Pfam profile PF01370 NAD dependent epimerase/dehydratase family                                                                                                                                                                                                  | At5g28840   | 1705.07158  | 1129.764 | 1832.47509 | 1384.063 | 3840.62325   | 1753.779 | 1.674374477  | 0.5214    |
| 30422 | 47 auxin-responsive GH3 family protein similar to auxin-responsive GH3 product [Glycine max] GI:18591; contains Pfam profile PF03321: GH3 auxin-responsive promoter                                                                                                                                                                                                                                      | At5g13370   | 703.037575  | 459.113  | 309.642623 | 223.267  | 80.360234    | 224.832  | 2.263108296  | 0.520828  |
| 26958 | 42 jacalin lectin family protein similar to SP Q9SAV1 Myrosinase binding protein-like At1g52030 [Arabidopsis thaliana]; contains Pfam profile: PF01419 jacalin-like lectin domain                                                                                                                                                                                                                        | At3g16450   | 5265.292658 | 3223.773 | 3956.07158 | 2886.038 | 4635.42692   | 2485.196 | 1.623082755  | 0.518868  |
| 19859 | 31 asparagine synthetase 1 [glutamine-hydrolyzing] / glutamine-dependent asparagine synthetase 1 (ASN1) identical to SP P49078 Asparagine synthetase [glutamine-hydrolyzing] [EC 6.3.5.4] [Glutamine- dependent asparagine synthetase] (Arabidopsis thaliana)                                                                                                                                            | At3g47340   | 467.39397   | 229.677  | 1138.86274 | 363.042  | 2087.82618   | 251.607  | 4.48999301   | 0.516516  |
| 28616 | 45 no apical meristem (NAM) family protein contains Pfam PF02365: No apical meristem (NAM) domain; similar to NAC domain containing protein NAM GB:AAD17313 GI:4325282 from [Arabidopsis thaliana]                                                                                                                                                                                                       | At1g01720   | 1770.37531  | 1473.838 | 2360.17554 | 1886.714 | 1994.4135    | 736.52   | 1.720011192  | 0.515592  |
| 29365 | 42 expressed protein                                                                                                                                                                                                                                                                                                                                                                                     | At3g19600   | 625.628443  | 403.134  | 630.426027 | 542.109  | 447.485584   | 213.921  | 1.602543437  | 0.514796  |
| 9509  | 14 glycine-rich protein (GRP3S) identical to cDNA glycine-rich protein 3 short isoform (GRP3S) GI:4206766                                                                                                                                                                                                                                                                                                | At2g05380   | 1625.01959  | 11608.79 | 19018.8094 | 14729.65 | 22993.2763   | 11367.69 | 1.5654895516 | 0.511758  |
| 8647  | 14 gibberellin-responsive protein, putative similar to SP P4689 Gibberellin-regulated protein 1 precursor (Arabidopsis thaliana); contains Pfam profile PF02704: Gibberellin regulated protein                                                                                                                                                                                                           | At2g18420   | 1057.91695  | 633.314  | 793.422077 | 330.877  | 7259.93477   | 753.934  | 4.5659288    | 0.50949   |
| 18034 | 28 PQ-loop repeat family protein / transmembrane family protein similar to SP Q10482 Seven transmembrane protein 1 [Schizosaccharomyces pombe]; contains Pfam profile PF04193: PQ loop repeat                                                                                                                                                                                                            | At4g36850   | 501.480129  | 235.461  | 352.387719 | 216.48   | 657.870305   | 358.637  | 1.863983296  | 0.508956  |
| 30661 | 48 cytochrome P450, putative similar to SP-Q42569 from [Arabidopsis thaliana]                                                                                                                                                                                                                                                                                                                            | At1g55940   | 407.874483  | 294.335  | 411.931619 | 214.958  | 589.57236    | 198.995  | 2.088587738  | 0.5031    |
| 28560 | 44 expressed protein                                                                                                                                                                                                                                                                                                                                                                                     | At5g58650   | 357.609994  | 308.912  | 440.540416 | 281.895  | 558.471906   | 281.798  | 1.567413985  | 0.502824  |
| 16701 | 26 expressed protein                                                                                                                                                                                                                                                                                                                                                                                     | At4g27040   | 526.340167  | 458.305  | 412.291719 | 358.861  | 1756.02601   | 548.857  | 1.832254275  | 0.500976  |
| 29704 | 46 expressed protein                                                                                                                                                                                                                                                                                                                                                                                     | At4g28080   | 2882.50989  | 2039.285 | 1681.74155 | 1171.269 | 2740.74791   | 1469.623 | 1.57141724   | 0.50049   |
| 26951 | 42 2-oxoisovalerate dehydrogenase / 3-methyl-2-oxobutanoate dehydrogenase / branched-chain alpha-keto acid dehydrogenase E1 beta subunit (DIN4) identical to branched chain alpha-keto acid dehydrogenase E1 beta subunit [Arabidopsis thaliana] GI:7021286                                                                                                                                              | At3g13450   | 852.767889  | 542.894  | 1126.64007 | 851.199  | 942.310513   | 487.554  | 1.609304662  | 0.49662   |
| 13215 | 21 sinapoylglucosyl:malate sinapoyltransferase (SNG1) similar to serine carboxypeptidase I precursor (SP:P37890) [Oryza sativa]; contains Pfam profile PF00450: Serine carboxypeptidase; identical to cDNA sinapoylglucosyl:malate sinapoyltransferase (SNG1) GI:8699618                                                                                                                                 | At2g22990   | 4727.50061  | 3288.406 | 3052.85896 | 2231.705 | 5543.61904   | 2696.614 | 1.620448761  | 0.494286  |
| 19842 | 31 cytochrome P450 family protein contains Pfam profile: PF00067 cytochrome P450                                                                                                                                                                                                                                                                                                                         | At3g28740   | 1948.39578  | 1355.407 | 429.514358 | 290.052  | 532.469184   | 176.831  | 1.976497567  | 0.493228  |
| 23827 | 37 integral membrane family protein contains TIGRFAM TIGR01569: plant integral membrane protein TIGR01569; contains Pfam PF04535: Domain of unknown function (DUF588)                                                                                                                                                                                                                                    | At4g15610   | 1596.99575  | 916.524  | 2537.63241 | 1541.72  | 4948.5391    | 753.343  | 3.215255964  | 0.485289  |
| 16063 | 25 expressed protein                                                                                                                                                                                                                                                                                                                                                                                     | At4g29050   | 4001.74107  | 1703.996 | 3897.2192  | 1590.37  | 4708.83912   | 3853.931 | 2.007014386  | 0.4842716 |
| 23835 | 37 expressed protein                                                                                                                                                                                                                                                                                                                                                                                     | At4g18740   | 311.151039  | 235.378  | 297.515553 | 198.571  | 441.761727   | 156.103  | 1.883380368  | 0.489168  |
| 13750 | 22 expressed protein similar to PGPS/D12 [Petunia x hybrida] GI:4105794; contains Pfam profile PF04749: Protein of unknown function, DUF614                                                                                                                                                                                                                                                              | At1g52200   | 640.665542  | 290.882  | 256.532714 | 157.974  | 522.615325   | 426.776  | 1.68365026   | 0.485112  |
| 29083 | 45 catalase 2 identical to catalase 2 SP-P25819, GI:17865693 from [Arabidopsis thaliana]                                                                                                                                                                                                                                                                                                                 | At4g35090   | 3341.16332  | 2392.986 | 2266.62135 | 1832.177 | 3628.38487   | 1650.253 | 1.610678359  | 0.483807  |
| 8916  | 14 UDP-glucuronosyl/UDP-glucosyl transferase family protein contains Pfam profile: PF00201 UDP-glucuronosyl and UDP-glucosyl transferase                                                                                                                                                                                                                                                                 | At4g34135   | 1117.30488  | 803.638  | 977.613015 | 816.577  | 3149.57684   | 1020.532 | 1.891242683  | 0.482856  |
| 1525  | 3 WRKY family transcription factor                                                                                                                                                                                                                                                                                                                                                                       | At2g30250   | 447.30101   | 289.577  | 546.162723 | 274.967  | 576.682677   | 316.847  | 1.783673898  | 0.47712   |
| 13977 | 22 hydrolase, alpha/beta fold family protein low similarity to 3-oxoadipate enol-lactone hydrolase [Pseudomonas sp. B13] GI:17736948, B-ketoadipate enol-lactone hydrolase [Bradyrhizobium japonicum] GI:2239060; contains Pfam profile:PF00561 abhydrolase/alpha/beta hydrolase fold                                                                                                                    | At3g24420   | 302.286434  | 267.16   | 392.623271 | 335.09   | 607.63604    | 187.542  | 1.847725218  | 0.472685  |
| 12855 | 20 glutamate dehydrogenase 2 (GDH2) identical to glutamate dehydrogenase 2 (GDH 2) [Arabidopsis thaliana] SWISS-PROT:Q38946                                                                                                                                                                                                                                                                              | At5g07440   | 3403.08079  | 1891.486 | 4092.93332 | 2626.374 | 5715.37392   | 2574.548 | 1.958916873  | 0.471707  |
| 17967 | 28 major latex protein-related / MLP-related low similarity to major latex protein [Papaver somniferum] GI:2940601; contains Pfam profile PF00407: Pathogenesis-related protein Bet v I family                                                                                                                                                                                                           | At4g14060   | 1882.7776   | 827.188  | 326.956084 | 242.282  | 1673.64866   | 1007.612 | 1.762202956  | 0.47073   |
| 20031 | 31 NADP-dependent oxidoreductase, putative strong similarity to probable NADP-dependent oxidoreductase (zeta-crySTALLIN homolog) P1 [SP Q39172]GI:886430, Arabidopsis thaliana                                                                                                                                                                                                                           | At5g16980   | 1698.63063  | 1203.975 | 1799.39469 | 1346.834 | 2344.18527   | 754.096  | 1.930318696  | 0.46215   |
| 9599  | 15 arginase, putative similar to Swiss-Prot P46637 arginase (EC 3.5.3.1) [Arabidopsis thaliana]                                                                                                                                                                                                                                                                                                          | At4g08870   | 351.727354  | 217.176  | 480.012748 | 263.89   | 480.012748   | 169.303  | 1.59185154   | 0.461336  |
| 24028 | 37 no apical meristem (NAM) family protein contains Pfam PF02365: No apical meristem (NAM) domain; contains similarity to NAC-domain protein                                                                                                                                                                                                                                                             | At5g63790   | 2459.29669  | 1768.805 | 2794.274   | 2441.158 | 3585.37166   | 1332.859 | 1.744170418  | 0.459648  |
| 1107  | 2 villin, putative similar to villin 2 (VLN2) [Arabidopsis thaliana] GI:3415115, villin 3 (VLN3) [Arabidopsis thaliana] GI:3415117; contains Pfam profiles PF00626: Gelsolin repeat, PF02209: Villin headpiece domain                                                                                                                                                                                    | At4g30160   | 2998.03746  | 1838.975 | 2274.20734 | 2042.05  | 2388.26886   | 1256.566 | 1.548198727  | 0.45864   |
| 4701  | 8 integral membrane protein, putative strong similarity to integral membrane protein GI:1209756 from [Beta vulgaris]; contains Pfam profile PF00083: major facilitator superfamily protein                                                                                                                                                                                                               | At1g75220   | 371.320825  | 280.851  | 237.052283 | 157.326  | 970.818453   | 494.454  | 1.597433685  | 0.458755  |
| 6345  | 10 expressed protein                                                                                                                                                                                                                                                                                                                                                                                     | At5g01280   | 275.14607   | 222.294  | 340.233561 | 267.169  | 281.825709   | 102.195  | 1.75631983   | 0.457884  |
| 6431  | 10 26S proteasome regulatory subunit, putative (RPN9) contains similarity to 26S proteasome subunit p40.5 GI:3618343 from [Homo sapiens]                                                                                                                                                                                                                                                                 | At5g45620   | 3773.09139  | 2160.17  | 3908.15443 | 2364.345 | 5128.658     | 1324.07  | 2.424340819  | 0.454674  |
| 23977 | 37 serine protease inhibitor, potato inhibitor 1-type family protein similar to SP P24076 Glu S.griseus protease inhibitor (BGIA) [Momordica charantia]; contains Pfam profile PF00280: Potato inhibitor I family                                                                                                                                                                                        | At5g43570   | 337.278519  | 178.679  | 515.343935 | 245.868  | 1205.27389   | 118.804  | 4.709567618  | 0.452709  |
| 1519  | 24 calcium-transporting ATPase 4, plasma membrane-type / Ca2+-ATPase, isoform 4 (ACA4) identical to SP Q22218 Calcium-transporting ATPase 4, plasma membrane-type (EC 3.6.3.8) (Ca2+)-ATPase isoform 4 (Arabidopsis thaliana)                                                                                                                                                                            | At2g41560   | 192.19977   | 160.194  | 634.167938 | 385.475  | 840.213077   | 450.361  | 1.570206671  | 0.451704  |
| 4292  | 1 expressed protein contains Pfam PF05421: Protein of unknown function (DUF751)                                                                                                                                                                                                                                                                                                                          | At4g16410   | 3138.19404  | 2127.783 | 2157.76133 | 1849.897 | 4777.5563    | 2437.021 | 1.533898802  | 0.451269  |
| 16397 | 26 expressed protein contains Pfam profile: PF00561 alpha/beta hydrolase fold                                                                                                                                                                                                                                                                                                                            | At1g73750   | 266.90286   | 221.55   | 453.82586  | 306.23   | 344.47266    | 149.997  | 1.661071567  | 0.449862  |
| 23615 | 37 sinapoylglucosyl:malate sinapoyltransferase (SNG1) similar to serine carboxypeptidase I precursor (SP:P37890) [Oryza sativa]; contains Pfam profile PF00450: Serine carboxypeptidase; identical to cDNA sinapoylglucosyl:malate sinapoyltransferase (SNG1) GI:8699618                                                                                                                                 | At2g22990   | 4727.50061  | 3288.406 | 3052.85896 | 2231.705 | 5543.61904   | 2696.614 | 1.620448761  | 0.449286  |
| 1222  | 2 metalloendopeptidase identical to chloroplast processing enzyme metalloendopeptidase [Arabidopsis thaliana] gi 2227039 g :886430                                                                                                                                                                                                                                                                       | At5g16980   | 1698.63063  | 1203.975 | 1799.39469 | 1346.834 | 2344.18527   | 754.096  | 1.930318696  | 0.46215   |
| 10371 | 16 MA3 domain-containing protein low similarity to programmed cell death 4 protein [Gallus gallus] GI:12958564; contains Pfam profile PF02847: MA3 domain                                                                                                                                                                                                                                                | At5g63190   | 282.490814  | 222.888  | 425.368839 | 308.637  | 830.606647   | 439.573  | 1.511732801  | 0.443111  |
| 17007 | 27 AP2 domain-containing protein RAP2.12 (RAP2.12) identical to AP2 domain containing protein GI:2281649 from [Arabidopsis thaliana]                                                                                                                                                                                                                                                                     | At1g53910   | 9939.20029  | 5701.513 | 9052.98485 | 5221.677 | 8509.22008   | 4206.881 | 1.833226287  | 0.43282   |
| 16082 | 25 senescence-associated protein (SEN1) identical to senescence-associated protein GI:1046270 from [Arabidopsis thaliana]                                                                                                                                                                                                                                                                                | At4g35770   | 1619.12941  | 532.436  | 2529.72031 | 1262.767 | 3030.33876   | 1823.453 | 2.235389202  | 0.42768   |
| 2147  | 4 zinc finger (C3HC4-type RING finger) family protein contains Pfam PF00097: Zinc finger, C3HC4-type (RING finger) domain; similar to RING-H2 finger protein RHA3a (GI:3790573) [Arabidopsis thaliana]; similar to ReMembr-R-H2 protein JR700 (GI:6942147) [Arabidopsis thaliana]                                                                                                                        | At2g17730   | 308.399033  | 220.022  | 360.196781 | 253.407  | 889.758664   | 455.032  | 1.593495967  | 0.42435   |
| 24134 | 38 expressed protein                                                                                                                                                                                                                                                                                                                                                                                     | At1g36640   | 525.304823  | 314.184  | 290.499984 | 237.34   | 304.733507   | 148.833  | 1.647811369  | 0.420036  |
| 10014 | 16 cytochrome P450 family protein                                                                                                                                                                                                                                                                                                                                                                        | At2g45560   | 830.47482   | 674.413  | 866.672069 | 687.117  | 1274.76019   | 605.184  | 1.533040509  | 0.41888   |
| 13860 | 22 protein phosphatase 2C, putative / PP2C, putative                                                                                                                                                                                                                                                                                                                                                     | At2g25070   | 926.889159  | 796.283  | 926.928202 | 765.436  | 4095.28538   | 1062.742 | 2.076169664  | 0.418656  |
| 4730  | 8 glycine-rich protein                                                                                                                                                                                                                                                                                                                                                                                   | At2g05540   | 1613.71952  | 1076.313 | 1011.26639 | 816.128  | 3507.71377   | 1439.974 | 1.7247874    | 0.41624   |
| 2368  | 4 xyloglucan/xyloglucosyl transferase, putative / xyloglucan endotransglycosylase, putative / endo-xyloglucan transferase, putative (XTR7) almost identical to xyloglucan endotransglycosylase-related protein XTR7 GI:1244760 from [Arabidopsis thaliana], one amino acid difference                                                                                                                    | At4g14130   | 281.026572  | 187.022  | 233.958063 | 149.863  | 722.432768   | 481.665  | 1.521271049  | 0.413899  |
| 14553 | 23 kelch repeat-containing F-box family protein contains F-box domain Pfam:PF00646 and Kelch motif Pfam:PF01344                                                                                                                                                                                                                                                                                          | At3g98210   | 451.271795  | 413.45   | 347.1335   | 305.028  | 415.16167592 | 169.55   | 1.537185194  | 0.413849  |
| 11761 | 19 proton-dependent oligopeptide transport (POT) family protein contains Pfam profile: PF00854 POT family                                                                                                                                                                                                                                                                                                | At1g22570   | 460.559411  | 273.783  | 343.691155 | 156.559  | 758.808949   | 429.133  | 1.871851706  | 0.411348  |
| 22790 | 36 expressed protein                                                                                                                                                                                                                                                                                                                                                                                     | At1g13245   | 2381.87472  | 1554.505 | 3464.5213  | 1934.383 | 1832.80528   | 863.746  | 1.815066255  | 0.4004    |
| 30114 | 47 serine carboxypeptidase S10 family protein similar to serine carboxypeptidase I precursor (SP:P37890) [Oryza sativa]                                                                                                                                                                                                                                                                                  | At2g22920   | 3879.00245  | 2734.365 | 3100.55463 | 2327.008 | 3346.39008   | 1877.564 | 1.511112355  | 0.396198  |
| 19164 | 30 expressed protein                                                                                                                                                                                                                                                                                                                                                                                     | At3g20340</ |             |          |            |          |              |          |              |           |

|        |    |                                                                                                                                                                                                                                                                                                      |  |
|--------|----|------------------------------------------------------------------------------------------------------------------------------------------------------------------------------------------------------------------------------------------------------------------------------------------------------|--|
| 4042   | 7  | expressed protein                                                                                                                                                                                                                                                                                    |  |
| 6180   | 10 | leucine-rich repeat family protein                                                                                                                                                                                                                                                                   |  |
| 17618  | 28 | expressed protein                                                                                                                                                                                                                                                                                    |  |
| 16921  | 27 | leucine-rich repeat protein kinase, putative similar to light repressible receptor protein kinase, gij2129635; contains leucine rich repeat (LRR) domains, Pfam:PF00560; contains protein kinase domain, Pfam:PF00069                                                                                |  |
| 1133   | 2  | G-box binding factor 1 (GBF1) identical to G-box binding factor 1 SP:P42774 from [Arabidopsis thaliana]; contains Pfam profile: PF00170 bZIP transcription factor                                                                                                                                    |  |
| 30386  | 47 | expressed protein                                                                                                                                                                                                                                                                                    |  |
| 1227   | 2  | disease resistance protein (TIR-NBS-LRR class), putative (RPS4) domain signature TIR-NBS-LRR exists, suggestive of a disease resistance protein. Identical to RPS4 (GI:11357255). False intron created at intron 2 to escape a frameshift in the BAC sequence.                                       |  |
| 26208  | 44 | expressed protein                                                                                                                                                                                                                                                                                    |  |
| 30325  | 47 | UDP-glucuronosyl/UDP-glucosyl transferase family protein contains Pfam profile: PF00201 UDP-glucuronosyl and UDP-glucosyl transferase ;similar to UDP-glucose:sinapate glucosyltransferase GI:9794913 from [Brassica napus]                                                                          |  |
| 4437   | 7  | UDP-glucuronosyl/UDP-glucosyl transferase family protein contains Pfam profile: PF00069                                                                                                                                                                                                              |  |
| 1563   | 3  | UDP-glucuronosyl/UDP-glucosyl transferase family protein contains Pfam profile: PF00201 UDP-glucuronosyl and UDP-glucosyl transferase                                                                                                                                                                |  |
| 28594  | 44 | thioesterase family protein contains Pfam profile PF03061: thioesterase family protein                                                                                                                                                                                                               |  |
| 27408  | 43 | GDSL-motif lipase/hydrolase family protein similar to lipase GI:1145627 from [Arabidopsis thaliana]; contains Pfam profile PF00657: Lipase/Acylhydrolase with GDSL-like motif                                                                                                                        |  |
| 21214  | 33 | zinc finger (C3HC4-type RING finger) family protein zinc finger protein, Arabidopsis thaliana, gb:L76926                                                                                                                                                                                             |  |
| 780    | 2  | MATE efflux family protein contains TIGRfam profile: TIGR00797: MATE efflux family protein, Pfam profile PF01554: Uncharacterized membrane protein family                                                                                                                                            |  |
| 11139  | 18 | expressed protein similar to putative non-LTR retroelement reverse transcriptase GB:AAD21515 GI:4510429 from [Arabidopsis thaliana]; expression supported by MPSS                                                                                                                                    |  |
| 8446   | 13 | MATE efflux family protein similar to ripening regulated protein DDTFR18 [Lycopersicon esculentum] GI:12231296; contains Pfam profile PF01554: Uncharacterized membrane protein family                                                                                                               |  |
| 5486   | 9  | expressed protein identical to unknown protein GB:AAF30301 from [Arabidopsis thaliana]                                                                                                                                                                                                               |  |
| 26698  | 42 | myb family transcription factor (MYB58) contains PFAM profile: myb DNA binding domain PF00249                                                                                                                                                                                                        |  |
| 4922   | 8  | expressed protein                                                                                                                                                                                                                                                                                    |  |
| 19234  | 30 | glycosyl hydrolase family 1 protein contains Pfam PF00232: Glycosyl hydrolase family 1 domain; TIGRFAM TIGR01233: 6-phospho-beta-galactosidase; similar to Cyanogenic Beta-Glucosidase (GI:1311386)(pdb:1CBG) [Trifolium Repens]; identical beta-galactosidase GI:10834547                           |  |
| 5901   | 10 | expressed protein                                                                                                                                                                                                                                                                                    |  |
| 9540   | 15 | hypothetical protein                                                                                                                                                                                                                                                                                 |  |
| 16714  | 26 | expressed protein                                                                                                                                                                                                                                                                                    |  |
| 22152  | 35 | phytochrome kinase substrate-related contains weak similarity to Swiss-Prot:Q9SW11 phytochrome kinase substrate 1 [Arabidopsis thaliana]                                                                                                                                                             |  |
| 23935  | 37 | myb family transcription factor similar to CCA1 [Arabidopsis thaliana] GI:4090569; contains Pfam profile PF00249: Myb-like DNA-binding domain                                                                                                                                                        |  |
| 30576  | 48 | branched-chain amino acid aminotransferase 2 / branched-chain amino acid transaminase 2 (BCAT2) identical to SPIQ9M439 Branched-chain amino acid aminotransferase 2, chloroplast precursor (EC 2.6.1.42) [Atbcat-2] (Arabidopsis thaliana); contains Pfam profile: PF01063 aminotransferase class IV |  |
| 11820  | 19 | expressed protein                                                                                                                                                                                                                                                                                    |  |
| 256    | 1  | nucleotidyltransferase family protein contains Pfam profile: PF01909 nucleotidyltransferase domain                                                                                                                                                                                                   |  |
| 2782   | 5  | expressed protein                                                                                                                                                                                                                                                                                    |  |
| 10360  | 16 | haloacid dehalogenase-like hydrolase family protein low similarity to SPIP53078 SSM1 protein (Saccharomyces cerevisiae); contains InterPro accession IPR005834: Haloacid dehalogenase-like hydrolase                                                                                                 |  |
| 17478  | 27 | expressed protein                                                                                                                                                                                                                                                                                    |  |
| 22503  | 35 | expressed protein contains Pfam profile PF04520: Protein of unknown function, DUF584                                                                                                                                                                                                                 |  |
| 17127  | 27 | hypothetical protein                                                                                                                                                                                                                                                                                 |  |
| 18014  | 28 | protease inhibitor/seed storage/lipid transfer protein (LTP) family protein contains Pfam protease inhibitor/seed storage/LTP family domain PF00234                                                                                                                                                  |  |
| 14449  | 23 | MADS-box protein (AGL60) contains Pfam profile: PF00319 SRF-type transcription factor (DNA-binding and dimerisation domain)                                                                                                                                                                          |  |
| 17030  | 27 | expressed protein contains Pfam profile PF03140: Plant protein of unknown function                                                                                                                                                                                                                   |  |
| 28     | 1  | L-allo-threonine aldolase-related similar to L-allo-threonine aldolase (EC 4.1.2.-) (L-allo-TA) (L-allo-threonine acetaldehyde-lyase) (SP:O07051) (Aeromonas jandaei); similar to ESTs gb R30517, gb T42772, gb R90493, and gb R90493                                                                |  |
| 25885  | 40 | hydrolase, alpha/beta fold family protein low similarity to hydrolase [Terrabacter sp. DBF63] GI:14196240; contains Pfam profile PF00561: hydrolase, alpha/beta fold family                                                                                                                          |  |
| 16271  | 29 | phytochrome and flowering time regulatory protein (PFT1) PMID: 12815435                                                                                                                                                                                                                              |  |
| 18169  | 28 | peptidylcan-binding LysM domain-containing protein contains Pfam profile PF01476: LysM domain                                                                                                                                                                                                        |  |
| 23501  | 37 | F-box family protein contains F-box domain Pfam:PF00646                                                                                                                                                                                                                                              |  |
| 23064  | 36 | hypothetical protein                                                                                                                                                                                                                                                                                 |  |
| 1004   | 2  | cytochrome P450 71A21, putative (CYP71A21) identical to Cytochrome P450 71A21 (SP:Q9STL2) [Arabidopsis thaliana]                                                                                                                                                                                     |  |
| 9706   | 15 | expressed protein similar to unknown protein (pir T05871)                                                                                                                                                                                                                                            |  |
| 1293   | 2  | phosphate-responsive protein, putative similar to phi-1 (phosphate-induced gene) [Nicotiana tabacum] GI:3759184; contains Pfam profile PF04674: Phosphate-induced protein 1 conserved region                                                                                                         |  |
| 15370  | 24 | expressed protein                                                                                                                                                                                                                                                                                    |  |
| 2184   | 4  | nodulin-related contains 14 transmembrane domains; supported by tandem duplication of nodulin -related protein (TIGR_Ath1:At2g34350) [Arabidopsis thaliana]                                                                                                                                          |  |
| 11003  | 17 | ankyrin repeat family protein contains Pfam domain, PF00023: Ankyrin repeat                                                                                                                                                                                                                          |  |
| 14867  | 23 | hypothetical protein                                                                                                                                                                                                                                                                                 |  |
| 16698  | 28 | RNA recognition motif (RRM)-containing protein low similarity to tumor-rejection antigen SART3 [Mus musculus] GI:7637845; contains INTERPRO:IPR000504 RNA-binding region RNP-1 (RNA recognition motif) domain                                                                                        |  |
| 12001  | 22 | transcription elongation factor-related low similarity to transcription elongation factor TFIIS.h [Mus musculus] GI:3288547                                                                                                                                                                          |  |
| 22649  | 35 | ACT domain-containing protein contains Pfam ACT domain PF01842                                                                                                                                                                                                                                       |  |
| 551    | 1  | protein kinase family protein contains Pfam kinase domain, Pfam:PF00069                                                                                                                                                                                                                              |  |
| 19615  | 31 | pseudouridine synthase family protein low similarity to SPIP23851 Ribosomal large subunit pseudouridine synthase C (EC 4.2.1.70) (Pseudouridylylase) [Escherichia coli]; contains Pfam profile PF00849: RNA pseudouridylylase synthase                                                               |  |
| 17870  | 28 | lipid-binding serum glycoprotein family protein similar to SPIP17213 Bactericidal permeability-increasing protein precursor (BPI) (Homo sapiens); contains Pfam profile PF02886: LBP / BPI / CETP family, C-terminal domain                                                                          |  |
| 914    | 14 | peroxidase, putative identical to peroxidase ATP24a [Arabidopsis thaliana] gi 1990313 emb CAA72484                                                                                                                                                                                                   |  |
| 1015   | 1  | carbonic anhydrase family protein / carbonate dehydratase family protein similar to SPIP46512 Carbonic anhydrase 1 (EC 4.2.1.1) (Carbonate dehydratase 1) [Flaveria linearis]; contains Pfam profile PF00484: Carbonic anhydrase                                                                     |  |
| 20589  | 32 | MATE efflux family protein similar to ripening regulated protein DDTFR18 [Lycopersicon esculentum] GI:12231296; contains Pfam profile PF01554: MatE                                                                                                                                                  |  |
| 20476  | 32 | glycosyl hydrolase family 17 protein similar to elicitor inducible chitinase Nt-SubE76 GI:11071974 from [Nicotiana tabacum]                                                                                                                                                                          |  |
| 13547  | 21 | squalene monoxygenase 1,2 / squalene epoxidase 1,2 (SQEP1,2) identical to SPI065402                                                                                                                                                                                                                  |  |
| 427058 | 42 | hypothetical protein                                                                                                                                                                                                                                                                                 |  |
| 21221  | 33 | late embryogenesis abundant domain-containing protein / LEA domain-containing protein similar to LEA protein [Cicer arietinum] GI:2909420; contains Pfam profile PF02987: Late embryogenesis abundant protein                                                                                        |  |
| 17540  | 27 | miRNA gene Arabidopsis thaliana miR390f stem-loop                                                                                                                                                                                                                                                    |  |
| 17141  | 27 | UDP-glucuronosyl/UDP-glucosyl transferase family protein contains Pfam profile: PF00201 UDP-glucuronosyl and UDP-glucosyl transferase                                                                                                                                                                |  |
| 2054   | 4  | protein kinase family protein contains Serine/Threonine protein kinases active-site signature, PROSITE:PS00108                                                                                                                                                                                       |  |
| 1275   | 2  | ethylene insensitive 3 family protein contains Pfam profile: PF04873 ethylene insensitive 3                                                                                                                                                                                                          |  |
| 10676  | 17 | acyl-[acyl-carrier-protein] desaturase, putative / stearyl-ACP desaturase, putative similar to Acyl-[acyl-carrier protein] desaturase from Spinacia oleracea SPIP28645, Cucumis sativus SPIP32061, Ricinus communis SPIP22337; contains Pfam profile PF03405 Fatty acid desaturase                   |  |
| 7726   | 12 | hypothetical protein                                                                                                                                                                                                                                                                                 |  |
| 13987  | 22 | hypothetical protein contains Pfam profile PF03384: Drosophila protein of unknown function, DUF287                                                                                                                                                                                                   |  |
| 8030   | 13 | UDP-glucuronosyl/UDP-glucosyl transferase family protein contains Pfam profile: PF00201 UDP-glucuronosyl and UDP-glucosyl transferase                                                                                                                                                                |  |
| 20732  | 32 | ABC transporter family protein contains Pfam profile: PF00005 ABC transporter; similar to multidrug-resistant protein CjMDR1 GI:14715462 from [Coptis japonica]                                                                                                                                      |  |
| 12865  | 2  | miRNA gene Arabidopsis thaliana miR395e stem-loop                                                                                                                                                                                                                                                    |  |
| 2949   | 5  | hypothetical protein predicted protein, Arabidopsis thaliana                                                                                                                                                                                                                                         |  |
| 20365  | 32 | expressed protein                                                                                                                                                                                                                                                                                    |  |
| 29620  | 46 | yippee family protein similar to mdg1-1 [Mus musculus] GI:10441648, Yippee protein [Drosophila melanogaster] GI:5713279; contains Pfam profile PF03226: Yippee putative zinc-binding protein                                                                                                         |  |
| 1873   | 3  | hypothetical protein similar to unknown protein (emb CAB86921.1)                                                                                                                                                                                                                                     |  |
| 2183   | 4  | expressed protein                                                                                                                                                                                                                                                                                    |  |
| 4772   | 8  | leucine-rich repeat protein kinase, putative similar to light repressible receptor protein kinase [Arabidopsis thaliana] gi 1321686 emb CAA66376; contains leucine rich repeat (LRR) domains, Pfam:PF00069                                                                                           |  |
| 14839  | 23 | floral homeotic protein PISTILLATA (PI) contains Pfam profiles PF01486: K-box region and PF00319: SRF-type transcription factor (DNA-binding and dimerisation domain)                                                                                                                                |  |
| 20497  | 32 | receptor protein kinase-related similar to light repressible receptor protein kinase GI:1321686 from [Arabidopsis thaliana]                                                                                                                                                                          |  |
| 16559  | 26 | F-box family protein contains F-box domain Pfam:PF00646                                                                                                                                                                                                                                              |  |
| 29479  | 46 | expressed protein                                                                                                                                                                                                                                                                                    |  |
| 11129  | 18 | S-adenosyl-L-methionine:carboxyl methyltransferase family protein similar to defense-related protein cjs 1 [Brassica carinata]GI:14009292[ Mol Plant Pathol (2001) 2(3):159-169]                                                                                                                     |  |
| 28303  | 41 | auxin-responsive protein-related similar to indole-3-acetic acid induced protein arg7 (SP:P32295) [Vigna radiata]                                                                                                                                                                                    |  |
| 25920  | 40 | hypothetical protein                                                                                                                                                                                                                                                                                 |  |
| 14814  | 23 | expressed protein - expression supported by MPSS                                                                                                                                                                                                                                                     |  |
| 11374  | 18 | expressed protein contains Pfam domain PF05003: protein of unknown function (DUF668); expression supported by MPSS                                                                                                                                                                                   |  |
| 28142  | 44 | hypothetical protein                                                                                                                                                                                                                                                                                 |  |
| 20277  | 32 | MATE efflux family protein similar to ripening regulated protein DDTFR18 [Lycopersicon esculentum] GI:12231296; contains Pfam profile PF01554: Uncharacterized membrane protein family; contains 12 transmembrane domains, PMID: 11852613                                                            |  |
| 22551  | 35 | F-box family protein contains F-box domain Pfam:PF00646                                                                                                                                                                                                                                              |  |
| 9856   | 16 | DC1 domain-containing protein contains Pfam profile PF03107: DC1 domain                                                                                                                                                                                                                              |  |
| 10600  | 17 | expressed protein                                                                                                                                                                                                                                                                                    |  |
| 9016   | 14 | no apical meristem (NAM) family protein contains Pfam PF02365: No apical meristem (NAM) domain; NAC domain protein NAM, Arabidopsis thaliana, gb:AAD17313                                                                                                                                            |  |
| 16291  | 28 | expressed protein                                                                                                                                                                                                                                                                                    |  |
| 23994  | 37 | ankyrin repeat family protein contains ankyrin repeat domains, Pfam:PF00023                                                                                                                                                                                                                          |  |
| 16659  | 26 | subtilase family protein contains similarity to subtilase; SP1 GI:9957714 from [Oryza sativa]                                                                                                                                                                                                        |  |
| 11156  | 18 | calcium-binding EF-hand family protein contains Pfam profile: PF00036 EF hand                                                                                                                                                                                                                        |  |
| 16364  | 26 | glutathione S-transferase, putative similar to glutathione S-transferase GB:AAF29773 GI:6856103 from [Gossypium hirsutum]                                                                                                                                                                            |  |
| 7458   | 12 | F-box family protein contains F-box domain Pfam:PF00646                                                                                                                                                                                                                                              |  |

|             |            |         |            |          |             |         |             |          |
|-------------|------------|---------|------------|----------|-------------|---------|-------------|----------|
| At1g68945   | 261.445935 | 157.519 | 307.13786  | 194.681  | 227.20989   | 99.16   | 1.84292233  | 0.0285   |
| At3g26500   | 154.578679 | 101.428 | 96.5337762 | 61.341   | 287.310385  | 139.566 | 1.71878199  | 0.027885 |
| At1g27510   | 142.068977 | 124.584 | 135.950341 | 101.604  | 251.422876  | 122.879 | 1.508163122 | 0.027495 |
| At1g05700   | 192.703537 | 130.074 | 199.621046 | 154.116  | 179.039595  | 102.65  | 1.506972689 | 0.025872 |
| At4g36730   | 200.358457 | 152.574 | 212.410955 | 189.838  | 1335.41121  | 607.551 | 1.543372789 | 0.02432  |
| At4g35430   | 305.476965 | 263.299 | 201.799171 | 104.451  | 147.407865  | 81.415  | 1.634254204 | 0.0243   |
| At5g42520   | 220.251408 | 113.827 | 171.179552 | 146.234  | 358.287444  | 171.268 | 1.732507467 | 0.02405  |
| At2g44010   | 215.492887 | 119.051 | 180.546922 | 139.013  | 133.867315  | 95.045  | 1.505760614 | 0.023667 |
| At4g15490   | 191.831827 | 160.39  | 118.2327   | 118.2327 | 184.5229495 | 95.271  | 2.156380394 | 0.023187 |
| At5g20050   | 238.968901 | 130.655 | 181.415303 | 139.823  | 325.610326  | 156.765 | 1.734510329 | 0.022914 |
| At2g43840   | 204.050616 | 123.849 | 149.302706 | 130.509  | 288.320719  | 130.916 | 1.664637551 | 0.02128  |
| At1g35290   | 307.70809  | 191.945 | 209.687901 | 132.043  | 119.522621  | 70.289  | 1.630526173 | 0.019684 |
| At1g53940   | 280.260759 | 133.49  | 145.134473 | 108.856  | 164.837173  | 61.815  | 2.033126681 | 0.019536 |
| At4g10160   | 511.843202 | 400.304 | 317.652729 | 273.187  | 212.320852  | 64.378  | 1.913151218 | 0.01887  |
| At1g66760   | 281.051172 | 143.285 | 164.868249 | 141.866  | 236.370947  | 143.964 | 1.588499873 | 0.015708 |
| At1g47320   | 129.178507 | 92.626  | 91.4907886 | 60.552   | 119.007144  | 59.386  | 1.63651002  | 0.014664 |
| At1g33090   | 152.404241 | 130.642 | 199.527038 | 179.303  | 173.979673  | 60.843  | 1.712952935 | 0.01386  |
| At3g06080   | 274.671181 | 162.311 | 109.130888 | 53.519   | 316.193592  | 209.634 | 1.746556824 | 0.01326  |
| At1g16490   | 85.8514021 | 71.223  | 106.635959 | 63.672   | 345.426766  | 192.774 | 1.571352196 | 0.012546 |
| At3g56230   | 127.103588 | 101.428 | 149.549677 | 100.548  | 202.529642  | 100.038 | 1.592894654 | 0.010759 |
| At3g60140   | 163.883947 | 109.178 | 270.11293  | 182.171  | 375.652833  | 15.071  | 9.303118767 | 0.010248 |
| At1g19530   | 132.099505 | 61.514  | 58.1736101 | 40.551   | 420.62932   | 72.298  | 3.133347384 | 0.01005  |
| At4g19280   | 86.6159987 | 58.634  | 97.5152866 | 63.312   | 248.216609  | 95.777  | 1.869691751 | 0.009776 |
| At4g30790   | 137.501909 | 84.735  | 152.744366 | 135.939  | 117.297822  | 43.269  | 1.819083461 | 0.008526 |
| At1g18810   | 183.998299 | 142.503 | 1008.25175 | 56.505   | 78.2555943  | 64.938  | 6.779951779 | 0.008432 |
| At5g17300   | 96.4047125 | 65.593  | 198.014938 | 89.288   | 110.21723   | 54.052  | 1.908849215 | 0.008424 |
| At1g10070   | 151.817047 | 36.508  | 146.573278 | 33.886   | 1110.14776  | 71.997  | 7.96776554  | 0.008424 |
| At1g59590   | 187.83485  | 94.422  | 135.980614 | 98.473   | 185.373777  | 158.312 | 1.513714745 | 0.00774  |
| At2g40520   | 100.034836 | 43.817  | 100.980847 | 91.272   | 89.3239165  | 41.571  | 1.846031459 | 0.006663 |
| At2g07670   | 120.879705 | 69.833  | 68.9804151 | 57.438   | 329.165055  | 195.317 | 1.574380394 | 0.006432 |
| At5g59490   | 60.9783818 | 43.231  | 73.978757  | 80.86    | 163.723745  | 63.497  | 1.573325178 | 0.00598  |
| At5g44575   | 199.579809 | 70.997  | 138.093411 | 83.727   | 163.888965  | 31.875  | 3.200679215 | 0.005883 |
| At4g04630   | 69.4889583 | 51.703  | 76.4717678 | 62.846   | 845.693628  | 377.844 | 1.599674297 | 0.005625 |
| At2g30430   | 98.0304604 | 81.705  | 109.309345 | 68.07    | 617.056898  | 257.673 | 1.733458562 | 0.00546  |
| At4g30880   | 379.733001 | 254.416 | 104.695171 | 268.073  | 156.968932  | 44.475  | 2.184656396 | 0.005328 |
| At1g72350   | 87.2716457 | 26.72   | 204.158938 | 142.159  | 1116.83041  | 429.967 | 2.433254901 | 0.004648 |
| At1g65985   | 110.050299 | 65.886  | 146.372515 | 75.835   | 334.416735  | 138.344 | 2.005914144 | 0.0043   |
| At1g08630   | 99.8883053 | 30.275  | 112.623536 | 59.297   | 640.486358  | 41.41   | 6.888542509 | 0.00414  |
| At5g19850   | 122.308653 | 107.091 | 251.972515 | 215.736  | 192.209002  | 46.647  | 2.143522653 | 0.00363  |
| At1g25540   | 228.661445 | 165.151 | 102.955021 | 59.584   | 1495.5926   | 928.896 | 1.574177453 | 0.003621 |
| At5g73510   | 152.894335 | 121.988 | 110.201967 | 83.868   | 177.480793  | 94.295  | 1.60352526  | 0.003528 |
| At1g49810   | 108.350751 | 90.053  | 183.023005 | 136.61   | 104.718122  | 9.024   | 4.715779561 | 0.002714 |
| At3g19610   | 162.325582 | 137.48  | 168.856432 | 99.025   | 148.385209  | 90.139  | 1.51069782  | 0.002695 |
| At3g48320   | 150.635171 | 89.772  | 89.7110044 | 48.133   | 85.4166008  | 71.3    | 1.57992624  | 0.00198  |
| At5g54150   | 70.0365787 | 49.577  | 72.3991371 | 34.368   | 530.61759   | 301.602 | 1.759533013 | 0.00196  |
| At1g35140   | 133.531661 | 52.713  | 83.4411288 | 48.618   | 135.613751  | 87.895  | 1.930783017 | 0.001848 |
| At4g14990   | 144.702261 | 129.615 | 135.889793 | 115.168  | 2097.92953  | 744.454 | 1.704801785 | 0.00182  |
| At2g34355   | 99.2112668 | 65.204  | 75.7611288 | 53.593   | 206.786691  | 94.714  | 1.706155061 | 0.00175  |
| At5g54620</ |            |         |            |          |             |         |             |          |

|       |                                                                                                                                                                                                                                                                                                                                                           |           |            |          |            |          |            |          |              |            |
|-------|-----------------------------------------------------------------------------------------------------------------------------------------------------------------------------------------------------------------------------------------------------------------------------------------------------------------------------------------------------------|-----------|------------|----------|------------|----------|------------|----------|--------------|------------|
| 18395 | 29 xyloglucan fucosyltransferase, putative (FUT4) identical to SPIQ9SJ2 Probable fucosyltransferase 4 (EC 2.4.1.-) (AifUT4) (Arabidopsis thaliana); similar to SPIQ9SWH5 Galactoside 2-alpha-L-fucosyltransferase (EC 2.4.1.69) (Xyloglucan alpha-(1,2)-fucosyltransferase) (AifUT1) (Arabidopsis thaliana)                                               | At2g15390 | 1133.21368 | 1555.81  | 1075.49637 | 1449.85  | 481.521499 | 1120.857 | 0.633258309  | 0.635008   |
| 17421 | 27 3-isopropylmalate dehydrogenase, chloroplast, putative, strong similarity to SPIP29102 3-isopropylmalate dehydrogenase, chloroplast precursor (Brassica napus)                                                                                                                                                                                         | At5g14200 | 1476.25291 | 1960.594 | 1084.7777  | 1594.785 | 505.536542 | 1272.971 | 0.610098799  | 0.63495    |
| 23354 | 36 pectinesterase family protein contains Pfam profile: PF01095 pectinesterase                                                                                                                                                                                                                                                                            | At5g55590 | 1619.49949 | 1921.911 | 364.020847 | 651.356  | 566.655618 | 1229.065 | 0.620854301  | 0.6336     |
| 18990 | 30 AP2 domain-containing transcription factor, putative                                                                                                                                                                                                                                                                                                   | At1g71130 | 1414.91979 | 2321.514 | 642.796881 | 1003.692 | 752.829416 | 1481.759 | 0.657713293  | 0.63063    |
| 29019 | 45 protease inhibitor/seed storage/lipid transfer protein (LTP) family protein similar to pEARLI 1 (Accession No. L43080): an Arabidopsis member of a conserved gene family (PGF95-099), Plant Physiol. 109 (4), 1497 (1995); contains Pfam protease inhibitor/seed storage/LTP family domain PF00234                                                     | At4g12500 | 1375.60842 | 2216.844 | 1760.79297 | 3688.234 | 1304.93827 | 1798.645 | 0.607815197  | 0.62118    |
| 16490 | 29 expressed protein contains Pfam profile PF04862: Protein of unknown function, DUF642                                                                                                                                                                                                                                                                   | At3g08030 | 1116.28772 | 1547.955 | 857.604251 | 1180.465 | 421.532348 | 974.096  | 0.626792046  | 0.61776    |
| 6153  | 10 seven in absentia (SINA) family protein low similarity to SPIP21461 Developmental protein seven in absentia (Drosophila melanogaster); contains Pfam profile PF03145: Seven in absentia protein family                                                                                                                                                 | At3g13672 | 465.840953 | 544.613  | 482.844151 | 910.893  | 250.61667  | 444.479  | 0.649760963  | 0.61776    |
| 6624  | 11 aspartate aminotransferase, cytoplasmic isozyme 2 / transaminase A (ASP4) identical to aspartate aminotransferase, cytoplasmic isozyme 2 SP-P46646 [Arabidopsis thaliana]                                                                                                                                                                              | At1g62800 | 474.876865 | 558.403  | 533.006342 | 1020.786 | 310.781063 | 644.018  | 0.620528426  | 0.613008   |
| 4419  | 7 sulfate transporter identical to sulfate transporter [Arabidopsis thaliana] GI:2114104                                                                                                                                                                                                                                                                  | At5g10190 | 94.947621  | 695.219  | 847.366    | 385.244  | 1304.87429 | 135.84   | 0.612        | 0.55880441 |
| 17251 | 27 60S acidic ribosomal protein P2 (RPP2D) acidic ribosomal protein P2, maize, PIR-S54179                                                                                                                                                                                                                                                                 | At3g44590 | 794.830887 | 1208.689 | 387.56435  | 617.719  | 710.500506 | 1235.704 | 0.620022855  | 0.604824   |
| 11400 | 18 expressed protein                                                                                                                                                                                                                                                                                                                                      | At3g45160 | 587.668299 | 787.865  | 177.310805 | 340.514  | 356.235845 | 989.931  | 0.54215806   | 0.601524   |
| 5042  | 8 lipid transfer protein, putative similar to lipid transfer protein 6 from Arabidopsis thaliana [gi:8571927]; contains Pfam protease inhibitor/seed storage/LTP family domain PF00234                                                                                                                                                                    | At5g01870 | 313.114771 | 523.68   | 384.653279 | 689.26   | 383.778812 | 703.904  | 0.567064714  | 0.598752   |
| 26134 | 41 glycosyl hydrolase family 1 protein contains Pfam PF00232: Glycosyl hydrolase family 1 domain; TIGRFAM TIGR01233: 6-phospho-beta-galactosidase; similar to beta-glucosidase 1 (GI:12043529) [Arabidopsis thaliana]                                                                                                                                     | At1g66280 | 697.145308 | 840.614  | 303.892183 | 494.949  | 321.599915 | 670.335  | 0.641025182  | 0.598347   |
| 11824 | 19 aspartate aminotransferase, cytoplasmic isozyme 2 / transaminase A (ASP4) identical to aspartate aminotransferase, cytoplasmic isozyme 2 SP-P46646 [Arabidopsis thaliana]                                                                                                                                                                              | At1g62800 | 596.458033 | 827.563  | 840.932915 | 1758.586 | 299.875652 | 752.502  | 0.532477366  | 0.595056   |
| 9572  | 15 expressed protein contains Pfam profile PF04862: Protein of unknown function, DUF642                                                                                                                                                                                                                                                                   | At4g32460 | 342.853123 | 539.991  | 398.665296 | 651.109  | 513.540868 | 721.42   | 0.653019209  | 0.59211    |
| 23669 | 37 expressed protein                                                                                                                                                                                                                                                                                                                                      | At2g46000 | 1097.70286 | 1435.249 | 1008.94487 | 2120.533 | 407.092806 | 865.308  | 0.570358262  | 0.588468   |
| 25092 | 39 expressed protein contains Pfam profile PF04396: Protein of unknown function, DUF537                                                                                                                                                                                                                                                                   | At3g61100 | 2283.83891 | 3001.513 | 1880.64399 | 2961.003 | 1120.5439  | 2054.866 | 0.647115257  | 0.58608    |
| 18763 | 29 expressed protein                                                                                                                                                                                                                                                                                                                                      | At5g36800 | 1323.03794 | 2477.41  | 1315.94729 | 2188.039 | 641.603912 | 1699.99  | 0.504294922  | 0.585316   |
| 13375 | 21 protease inhibitor/seed storage/lipid transfer protein (LTP) family protein contains Pfam protease inhibitor/seed storage/LTP family domain PF00234                                                                                                                                                                                                    | At3g53980 | 371.93155  | 1747.509 | 463.706159 | 3619.41  | 380.622046 | 1311.665 | 0.212220496  | 0.585174   |
| 12897 | 23 eukaryotic translation initiation factor 3 subunit 9 / eIF-3 eta / eIF3 (TIF3B1) nearly identical to SPIQ9CS21 Eukaryotic translation initiation factor 3 subunit 9 (eIF-3 eta) (eIF3 p110) (eIF3b) [Arabidopsis thaliana]                                                                                                                             | At5g27340 | 3927.36952 | 6253.568 | 3066.92711 | 4871.49  | 1643.12845 | 3905.036 | 0.595197708  | 0.58473    |
| 9216  | 15 nicotianamine synthase, putative similar to nicotianamine synthase [Lyocopersicon esculentum]GI:47538011, nicotianamine synthase 2 [Hordeum vulgare]GI:4894912                                                                                                                                                                                         | At1g56430 | 494.173889 | 915.084  | 503.299719 | 854.625  | 323.799997 | 736.022  | 0.522958859  | 0.582309   |
| 11507 | 18 GDSL-motif lipase/hydrolase family protein low similarity to family II lipases EXL3 GI:15054386, EXL1 GI:15054382 from [Arabidopsis thaliana]; contains Pfam profile PF00657: GDSL-like Lipase/Acylhydrolase                                                                                                                                           | At4g30140 | 1067.23399 | 1726.25  | 374.31874  | 972.999  | 180.91387  | 1015.806 | 0.393681134  | 0.581856   |
| 5022  | 8 peptidyl-prolyl cis-trans isomerase / cyclophilin (CYP1) / rotamase identical to cyclophilin (CYP1) gi 992643 gb AAV5512; similar to peptidyl-prolyl cis-trans isomerase, PPIase (cyclophilin, cyclosporin A-binding protein) [Catharanthus roseus] SWISS-PROT:Q39613                                                                                   | At4g34870 | 2204.44894 | 3128.739 | 2313.53946 | 3141.263 | 2847.46608 | 5394.925 | 0.656294993  | 0.578676   |
| 9277  | 15 plant defensin-fusion protein, putative (PDF2.1) plant defensin protein family member, personal communication, Bart Thomma (Bart.Thomma@agr.kuleuven.ac.be); contains a gamma-thionin family signature (PDOCO0725)                                                                                                                                     | At2g02120 | 908.955662 | 1859.646 | 213.800366 | 672.713  | 657.994019 | 2998.762 | 0.342006284  | 0.5742     |
| 30329 | 47 drought-responsive protein / drought-induced protein (Di21) identical to GI:469112; contains Pf03242 Late embryogenesis abundant protein domain                                                                                                                                                                                                        | At4g15910 | 1253.79177 | 2738.148 | 1572.84329 | 2381.044 | 290.64449  | 636.892  | 0.524938218  | 0.5733     |
| 4681  | 8 expressed protein                                                                                                                                                                                                                                                                                                                                       | At1g67865 | 351.031063 | 635.47   | 186.729162 | 325.996  | 413.053782 | 1402.153 | 0.473259073  | 0.56848    |
| 10260 | 16 amino acid permease 2 (AAP2) identical to amine acid permease AAP2 [Arabidopsis thaliana] GI:510236                                                                                                                                                                                                                                                    | At5g09220 | 418.864325 | 589.08   | 396.139818 | 905.74   | 463.378771 | 897.368  | 0.554929877  | 0.5568     |
| 27815 | 43 expressed protein contains Pfam profile PF04654: Protein of unknown function, DUF599                                                                                                                                                                                                                                                                   | At5g10580 | 539.729057 | 864.711  | 614.339188 | 1521.279 | 232.473941 | 544.776  | 0.493676743  | 0.55593    |
| 13352 | 21 GDSL-motif lipase, putative similar to family II lipases EXL3 GI:15054386, EXL1 GI:15054382, EXL2 GI:15054384 from [Arabidopsis thaliana]; contains Pfam profile PF00657: GDSL-like Lipase/Acylhydrolase                                                                                                                                               | At3g43570 | 808.171056 | 1092.098 | 854.790376 | 1499.623 | 241.880366 | 484.504  | 0.603059145  | 0.55593    |
| 13372 | 30 expressed protein                                                                                                                                                                                                                                                                                                                                      | At5g15960 | 502.501569 | 742.333  | 688.623537 | 1030.969 | 331.242976 | 510.159  | 0.652304121  | 0.53341    |
| 18717 | 29 nuclear matrix protein-related low similarity to nuclear matrix protein p84 [Homo sapiens] GI:550058                                                                                                                                                                                                                                                   | At5g09860 | 2369.3051  | 3190.201 | 2178.33664 | 3150.468 | 1110.03684 | 2371.137 | 0.634006246  | 0.5544     |
| 11885 | 19 expressed protein                                                                                                                                                                                                                                                                                                                                      | At2g07724 | 587.185922 | 728.83   | 661.682989 | 1217.21  | 277.50395  | 603.244  | 0.603093739  | 0.5544     |
| 29679 | 46 NLI interacting factor (NIF) family protein contains Pfam profile PF03031: NLI interacting factor                                                                                                                                                                                                                                                      | At4g18140 | 951.397309 | 1356.064 | 817.067554 | 1317.567 | 670.417015 | 1455.117 | 0.594150523  | 0.552188   |
| 24556 | 38 serine carboxypeptidase S10 family protein similar to Serine carboxypeptidase II chains A and B (SP-P08819) (EC 3.4.16.6) [Triticum aestivum (Wheat)]; carboxypeptidase D - Triticum aestivum, PIR-A29639                                                                                                                                              | At5g08260 | 359.578005 | 574.992  | 483.094308 | 568.647  | 235.632784 | 483.467  | 0.654097837  | 0.544896   |
| 11452 | 18 kinesin-like protein A, putative kinesin like protein A, Arabidopsis thaliana, gb:Q07970                                                                                                                                                                                                                                                               | At4g05190 | 357.99397  | 555.141  | 205.734772 | 271.04   | 349.831559 | 637.589  | 0.650868666  | 0.543348   |
| 18582 | 29 protease inhibitor/seed storage/lipid transfer protein (LTP) family protein contains Pfam profile: PF00234 protease inhibitor/seed storage/LTP family                                                                                                                                                                                                  | At3g57310 | 1808.29053 | 2433.132 | 1164.49036 | 2419.208 | 873.539696 | 1603.555 | 0.589766141  | 0.53856    |
| 11196 | 18 thaumatin-like protein, putative / pathogenesis-related protein, putative strong similarity to SPIP05699 Thaumatin-like protein precursor [Arabidopsis thaliana], pathogenesis-related group 5 protein [Brassica rapa] GI:2749943; contains Pfam profile: PF00314 thaumatin family                                                                     | At1g73620 | 743.990799 | 766.03   | 241.085079 | 696.227  | 250.864099 | 762.172  | 0.362205464  | 0.537342   |
| 3652  | 6 hypothetical protein                                                                                                                                                                                                                                                                                                                                    | At4g07740 | 743.145418 | 909.828  | 698.061014 | 1530.925 | 515.225447 | 867.483  | 0.622234174  | 0.5248     |
| 20951 | 33 protease inhibitor, putative (DR4) identical to DR4 GI:469114 from [Arabidopsis thaliana]; contains Pfam profile PF00197: Trypsin and protease inhibitor                                                                                                                                                                                               | At1g73330 | 927.28597  | 1533.271 | 346.785461 | 567.672  | 585.418981 | 926.99   | 0.615731202  | 0.521985   |
| 13871 | 22 osmotin-like protein, putative similar to SPIQ41350 Osmotin-like protein precursor (Lyocopersicon esculentum); contains Pfam profile PF00314: Thaumatin family                                                                                                                                                                                         | At2g28790 | 543.733531 | 1105.398 | 473.787487 | 780.278  | 314.010031 | 725.105  | 0.510717277  | 0.521848   |
| 12897 | 20 glycosyl hydrolase family 1 protein contains Pfam PF00232: Glycosyl hydrolase family 1 domain; TIGRFAM TIGR01233: 6-phospho-beta-galactosidase; identical to thioglucosidase (GI:871992) [Arabidopsis thaliana]; similar to myrosinase precursor (EC 3.2.3.1)(Sinigrinase) (Thioglucosidase) SPIP37702 from [Arabidopsis thaliana]                     | At5g25980 | 598.31055  | 1080.771 | 593.624716 | 4871.49  | 1643.12845 | 3905.036 | 0.595197708  | 0.52085    |
| 3108  | 5 hydroxyproline-rich glycoprotein family protein                                                                                                                                                                                                                                                                                                         | At5g05860 | 1051.94982 | 1265.282 | 145.49298  | 648.969  | 444.458703 | 1246.374 | 0.470740814  | 0.51901    |
| 4177  | 7 prokaryotic nuclear pore complex protein                                                                                                                                                                                                                                                                                                                | At3g02120 | 492.188765 | 701.509  | 392.898922 | 576.932  | 390.15217  | 681.096  | 0.6251819506 | 0.51448    |
| 29306 | 46 cell division control protein, putative cdc2Msf [Medicago sativa] gi 1806146 emb CAA65982                                                                                                                                                                                                                                                              | At1g20930 | 455.830838 | 713.948  | 378.692516 | 600.455  | 243.746392 | 482.075  | 0.591586735  | 0.511839   |
| 23745 | 37 phosphoenolpyruvate carboxylase-related / PEP carboxylase-related identical to phosphoenolpyruvate carboxylase [Arabidopsis thaliana] GP:26800701 over first 45 residues                                                                                                                                                                               | At3g42628 | 978.856405 | 1397.72  | 544.480134 | 895.105  | 352.786273 | 904.453  | 0.566221615  | 0.51128    |
| 23775 | 37 protease inhibitor/seed storage/lipid transfer protein (LTP) family protein contains Pfam protease inhibitor/seed storage/LTP family domain PF00234                                                                                                                                                                                                    | At3g53980 | 289.973533 | 1284.963 | 305.750042 | 1803.251 | 263.229361 | 703.665  | 0.256435028  | 0.51051    |
| 20273 | 32 expressed protein                                                                                                                                                                                                                                                                                                                                      | At1g64370 | 883.111618 | 1173.42  | 1276.21205 | 1971.714 | 627.853048 | 1280.71  | 0.630031167  | 0.510048   |
| 9619  | 15 inositol-3-phosphate synthase, putative / myo-inositol-1-phosphate synthase, putative / MI-1-P synthase, putative very strong similarity to SPIQ38862 Myo-inositol-1-phosphate synthase isozyme 2 (EC 5.5.1.4) (MI-1-P synthase 2) (IPS 2) [Arabidopsis thaliana]; identical to SPI QNLX12  Probable inositol-3-phosphate synth [Arabidopsis thaliana] | At5g10170 | 291.392854 | 425.977  | 282.275055 | 396.159  | 272.821357 | 507.596  | 0.644688259  | 0.503644   |
| 14054 | 22 hypothetical protein weak similarity to SPIQ13200 26 proteasome non-ATPase regulatory subunit S2 (26S proteasome subunit p97) (Tumor necrosis factor type 1 receptor associated protein 2) (Homo sapiens)                                                                                                                                              | At4g08140 | 361.339588 | 553.448  | 505.884151 | 750.272  | 247.552674 | 549.457  | 0.592256533  | 0.50184    |
| 8667  | 14 expressed protein contains similarity to anther-specific protein GI:1448935 from [Brassica rapa]                                                                                                                                                                                                                                                       | At2g28355 | 375.209785 | 507.529  | 286.354059 | 477.929  | 351.926457 | 573.296  | 0.650769545  | 0.495936   |
| 23595 | 37 xyloglucan fucosyltransferase, putative (FUT4) identical to SPIQ9SJ2 Probable fucosyltransferase 4 (EC 2.4.1.-) (AifUT4) (Arabidopsis thaliana); similar to SPIQ9SWH5 Galactoside 2-alpha-L-fucosyltransferase (EC 2.4.1.69) (Xyloglucan alpha-(1,2)-fucosyltransferase) (AifUT1) [Arabidopsis thaliana]                                               | At2g15390 | 586.769859 | 861.373  | 640.0324   | 932.297  | 343.761302 | 817.683  | 0.59604109   | 0.487078   |
| 18717 | 29 nuclear matrix protein-related low similarity to nuclear matrix protein p84 [Homo sapiens] GI:550058                                                                                                                                                                                                                                                   | At5g10220 | 470.345986 | 920.834  | 560.561927 | 870.642  | 233.106947 | 417.703  | 0.634006246  | 0.48552    |
| 22637 | 35 chaperonin, putative similar to SWISS-PROT:P78371- T-complex protein 1, beta subunit (TCP-1-beta) [Homo sapiens]; contains Pfam:PF00118 domain, TCP-1/cpn60 chaperonin family                                                                                                                                                                          | At5g20890 | 433.034002 | 647.133  | 484.149113 | 734.535  | 209.906358 | 513.743  | 0.57895445   | 0.48074    |
| 6762  | 11 glycosyl hydrolase family protein 17 similar to endo-1,3-beta-glucosidase precursor SP-P52409 from [Triticum aestivum]; C terminal homology only                                                                                                                                                                                                       | At2g43660 | 616.220497 | 847.724  | 614.6884   | 910.958  | 363.55768  | 888.53   | 0.603616897  | 0.472857   |
| 13442 | 21 pectate lyase family protein similar to pectate lyase 2 GP:6606534 from [Musa acuminata]                                                                                                                                                                                                                                                               | At4g22090 | 572.25899  | 763.364  | 483.608964 | 669.344  | 173.268315 | 446.826  | 0.6199806    | 0.4698     |
| 19305 | 30 beta-expansin, putative (XPB3) similar to soybean pollen allergen (cim1) protein - soybean, PIR2:S48032; beta-expansin gene family, PMID:11641069                                                                                                                                                                                                      | At4g28250 | 624.878674 | 788.971  | 642.208931 | 911.365  | 177.010678 | 455.978  | 0.62829874   | 0.463884   |
| 27422 | 43 flavin-containing monooxygenase family protein / FMO family protein similar to flavin-containing monooxygenase GB:AAA21178 GI:349534 SPIP32417 from [Oryctolagus cuniculus]; contains Pfam profile PF00743 Flavin-binding monooxygenase-like                                                                                                           | At1g62560 | 511.252799 | 862.439  | 506.408366 | 1058.972 | 201.718522 | 405.229  | 0.522931755  | 0.446959   |
| 21199 | 33 meprin and TRAF homology domain-containing protein / MATH domain-containing protein weak similarity to ubiquitin-specific protease 12 [Arabidopsis thaliana] GI:11993471; contains Pfam profile PF00917: MATH domain                                                                                                                                   | At4g01390 | 516.512949 | 878.815  | 532.496466 | 906.883  | 216.556012 | 471.764  | 0.54464826   | 0.4437     |
| 26713 | 42 ubiquitin extension protein, putative / 40S ribosomal protein S27A (RPS27aA) strong similarity to ubiquitin extension protein (UBQ5) GB:AAA32906 GI:166934 from (Arabidopsis thaliana)                                                                                                                                                                 | At1g23410 | 377.971417 | 590.929  | 412.843022 | 686.467  | 155.824573 | 376.35   | 0.551688869  | 0.442953   |
| 18575 | 29 protease inhibitor/seed storage/lipid transfer protein (LTP) family protein contains Pfam protease inhibitor/seed storage/LTP family domain PF00234                                                                                                                                                                                                    | At3g53980 | 331.807663 | 1741.057 | 301.812847 | 2860.952 | 214.056979 | 728.039  | 0.196696901  | 0.431172   |
| 20098 | 31 expressed protein system 1; expression supported by MPSS                                                                                                                                                                                                                                                                                               | At5g05730 | 456.323911 | 656.154  | 454.201893 | 715.897  | 194.404934 | 353.037  | 0.626856128  | 0.430582   |
| 15183 | 24 glycine cleavage system H protein, mitochondrial, putative similar to SPIQ39732 Glycine cleavage system H protein, mitochondrial precursor (Flaveria anomala); contains Pfam profile PF01597: Glycine cleavage H-protein                                                                                                                               | At2g35120 | 258.833077 | 409.671  | 633.62083  | 1137.631 | 311.855937 | 402.629  | 0.629612529  | 0.42987    |
| 27149 | 42 phenylalanine ammonia-lyase 3 (PAL3) nearly identical to SPIP45725                                                                                                                                                                                                                                                                                     | At5g04230 | 339.548149 | 439.663  | 343.687968 | 538.039  | 687.935448 | 975.996  | 0.656957708  | 0.4284     |
| 29188 | 45 senescence-associated protein-related similar to senescence-associated protein SAC102 (GI:22331931) [Arabidopsis thaliana];                                                                                                                                                                                                                            | At5g47060 | 165.309685 | 315.566  | 215.851021 | 434.021  | 187.198565 | 229.833  | 0.611892701  | 0.42484    |
| 28135 | 44 Ulp1 protease family protein contains Pfam profile PF02902: Ulp1 protease family, C-terminal catalytic domain; similar to At5g28270, At2g05450, At1g45090, At2g16180, At2g06750                                                                                                                                                                        | At2g12100 | 373.587927 | 997.279  | 230.927403 | 353.465  | 31         |          |              |            |



|       |                                                                                                                                                                                                                                                                             |           |            |          |             |         |            |         |             |          |
|-------|-----------------------------------------------------------------------------------------------------------------------------------------------------------------------------------------------------------------------------------------------------------------------------|-----------|------------|----------|-------------|---------|------------|---------|-------------|----------|
| 15014 | 24 lysine and histidine specific transporter, putative similar to lysine and histidine specific transporter GI:2576361 from [Arabidopsis thaliana]; contains Pfam profile PF01490: Transmembrane amino acid transporter protein                                             | At1g24400 | 79.9889368 | 124.85   | 109.275884  | 180.913 | 59.0262403 | 128.955 | 0.567477412 | 0.00966  |
| 9912  | 16 phosphoglycerate/bisphosphoglycerate mutase family protein similar to SPIP31217 Phosphoglycerate mutase 1 (EC 5.4.2.1) [Escherichia coli O157:H7]; contains Pfam profile PF00300: phosphoglycerate mutase family                                                         | At1g78050 | 50.6559521 | 69.412   | 31.3621246  | 132.688 | 43.0773819 | 84.601  | 0.491776492 | 0.0096   |
| 15551 | 24 actin-related protein, putative (ARPB) strong similarity to actin-related protein 8A (ARPB) [Arabidopsis thaliana] GI:21427473; contains Pfam profile PF00022: Actin; supporting cDNA gi 21427470 gb AF507916.1                                                          | At5g56180 | 218.014935 | 272.876  | 243.280731  | 273.006 | 35.1885219 | 144.774 | 0.64437644  | 0.00957  |
| 15316 | 24 pectate lyase family protein similar to pectate lyase 2 GP:6606534 from [Musa acuminata]                                                                                                                                                                                 | At3g53190 | 77.8604905 | 133.296  | 160.789245  | 260.618 | 53.205474  | 159.786 | 0.511350176 | 0.009177 |
| 6986  | 11 zinc finger protein-related similar to lateral root primordium 1 (LRP1) [Arabidopsis thaliana] GI:882341; contains Pfam profile PF05142: Domain of unknown function (DUF702), TIGR01624: LRP1 C-terminal domain, TIGR01623: putative zinc finger domain, LRP1 type       | At4g36260 | 57.8862521 | 68.025   | 35.5112366  | 106.854 | 32.7039228 | 71.288  | 0.547349166 | 0.009072 |
| 6646  | 11 disease resistance protein (TIR-NBS-LRR class), putative domain signature TIR-NBS-LRR exists, suggestive of a disease resistance protein.                                                                                                                                | At1g72860 | 39.2853428 | 70.368   | 67.2031869  | 94.542  | 46.4053014 | 80.171  | 0.615980712 | 0.008892 |
| 7086  | 11 forkhead-associated domain-containing protein / FHA domain-containing protein                                                                                                                                                                                            | At5g47790 | 59.9344806 | 93.966   | 66.0591537  | 94.096  | 40.9041309 | 98.363  | 0.585240097 | 0.00884  |
| 24599 | 38 kinesin motor protein-related non-consensus AT donor splice site at exon 12, non-consensus AC acceptor splice site at exon 13                                                                                                                                            | At5g27000 | 125.652132 | 157.286  | 133.115751  | 188.077 | 23.5308984 | 68.363  | 0.615391224 | 0.008184 |
| 1896  | 10 leucine-rich repeat family protein similar to recessor from [Petunia integrifolia]; contains protein kinase domain, Pfam:PF00069; contains leucine-rich repeats, Pfam:PF00560                                                                                            | At1g16080 | 38.9353244 | 175.229  | 107.623572  | 175.229 | 30.4293572 | 90.182  | 0.581609332 | 0.008162 |
| 22923 | 36 methyladenine glycosylase family protein similar to SPIJ05100 DNA-3-methyladenine glycosylase I (EC 3.2.2.20) (3-methyladenine-DNA glycosylase I, constitutive) [Escherichia coli]; contains Pfam profile PF03352: Methyladenine glycosylase                             | At1g90850 | 149.813731 | 197.331  | 227.809196  | 309.33  | 30.3966477 | 113.401 | 0.57564136  | 0.007808 |
| 20847 | 33 cyclin, putative similar to cyclin A2 [Lycopersicon esculentum] GI:5420276, cyclin [Medicago sativa] GI:1050559; contains Pfam profiles PF01034: Cyclin, N-terminal domain, PF02984: Cyclin, C-terminal domain                                                           | At1g15570 | 196.372336 | 322.28   | 201.053478  | 293.256 | 44.7805179 | 122.918 | 0.553075792 | 0.007626 |
| 7535  | 12 basic helix-loop-helix (bHLH) protein, putative very strong similarity to PIF3 like basic Helix Loop Helix Protein 2 (PIL2) [Arabidopsis thaliana] GI:22535494                                                                                                           | At3g62090 | 36.2969615 | 81.652   | 53.4604483  | 70.28   | 94.2271337 | 130.192 | 0.642988525 | 0.00759  |
| 30366 | 47 WRKY family transcription factor identical to WRKY DNA-binding protein 18 (WRKY18) GI:13506730 from [Arabidopsis thaliana]                                                                                                                                               | At4g31805 | 189.944044 | 295.707  | 93.2689795  | 143.731 | 53.9848753 | 92.271  | 0.625440282 | 0.007524 |
| 14799 | 23 ankyrin repeat family protein contains ankyrin repeat domains, Pfam:PF00023                                                                                                                                                                                              | At5g02620 | 181.266615 | 255.695  | 163.961627  | 192.828 | 27.8563771 | 85.679  | 0.62811404  | 0.007473 |
| 22358 | 35 ribonuclease P family-related similar to Ribonuclease P protein subunit p29 (EC 3.1.26.5) (hPOP4) (Swiss-Prot:O95707) [Homo sapiens]                                                                                                                                     | At2g43190 | 126.569823 | 140.725  | 126.13683   | 158.733 | 24.1552522 | 90.262  | 0.653890981 | 0.00708  |
| 15811 | 25 transport protein-related contains Pfam PF05911: Plant protein of unknown function (DUF869) profile; weak similarity to Intracellular protein transport protein USO1 (Swiss-Prot:P25386) [Saccharomyces cerevisiae]                                                      | At2g23360 | 61.7890248 | 138.126  | 119.80322   | 142.906 | 41.9598278 | 94.608  | 0.624660583 | 0.006837 |
| 9034  | 14 CHP-rich zinc finger protein, putative contains similarity to CHP-rich zinc finger protein                                                                                                                                                                               | At5g46660 | 308.289936 | 367.956  | 71.0925811  | 97.676  | 65.8408463 | 293.528 | 0.596664657 | 0.006624 |
| 20139 | 31 expressed protein                                                                                                                                                                                                                                                        | At5g67350 | 147.682085 | 304.365  | 113.753229  | 160.95  | 19.4458543 | 83.513  | 0.474941091 | 0.0066   |
| 19550 | 31 prenylated rab acceptor (PRA1) family protein weak similarity to prenylated Rab acceptor 1 (PRA1) [Homo sapiens] GI:4877285; contains Pfam profile PF03208: Prenyated rab acceptor (PRA1)                                                                                | At1g17700 | 102.59432  | 140.242  | 101.772747  | 136.596 | 39.1453234 | 99.276  | 0.623941315 | 0.00648  |
| 11733 | 19 expressed protein contains Pfam profile PF04520: Protein of unknown function, DUF584                                                                                                                                                                                     | At1g10700 | 101.31113  | 173.516  | 78.4570956  | 145.586 | 63.5946163 | 76.657  | 0.548494932 | 0.006394 |
| 25327 | 39 amino acid transporter 4, putative (AAP4) identical to amino acid transporter GI:608671 from [Arabidopsis thaliana];                                                                                                                                                     | At5g63850 | 123.441328 | 154.909  | 101.857195  | 192.899 | 21.8500391 | 72.649  | 0.54188635  | 0.006272 |
| 24835 | 39 cytochrome P450 family protein similar to Cytochrome P450 90A1 (SP:Q42569) [Arabidopsis thaliana]                                                                                                                                                                        | At1g65670 | 802.646722 | 1019.197 | 286.115055  | 343.317 | 32.7781515 | 92.183  | 0.65882999  | 0.00616  |
| 27444 | 43 CLE26, putative CLAVATA3/ESR-Related 26 (CLE26)                                                                                                                                                                                                                          | At1g69970 | 122.09046  | 154.473  | 88.0507222  | 113.509 | 23.7222515 | 89.903  | 0.609982792 | 0.006138 |
| 20711 | 32 calmodulin-binding protein-related has weak similarity to calmodulin-binding proteins                                                                                                                                                                                    | At5g39380 | 325.092897 | 410.248  | 279.994955  | 391.366 | 20.5943371 | 54.865  | 0.627741321 | 0.00568  |
| 27431 | 43 zinc finger (C2H2 type) family protein contains Pfam domain, PF00096: Zinc finger, C2H2 type                                                                                                                                                                             | At1g66140 | 125.098094 | 261.386  | 107.68093   | 149.955 | 27.7759627 | 89.86   | 0.50192872  | 0.005544 |
| 20201 | 32 cyclin, putative similar to SPIQ40671 G2/mitotic-specific cyclin 2 (B-like cyclin) (CYCOS2) [Oryza sativa]; contains Pfam profiles PF00134: Cyclin, N-terminal domain, PF02984: Cyclin, C-terminal domain                                                                | At1g20590 | 96.5940266 | 159.653  | 65.1620915  | 105.929 | 27.633691  | 108.108 | 0.491928486 | 0.005376 |
| 21036 | 33 DNA-binding family protein / AT-hook protein 1 (AHP1) identical to AT-hook protein 1 [Arabidopsis thaliana] gi 2598227 emb CAA10857                                                                                                                                      | At2g33620 | 192.761294 | 312.447  | 236.687403  | 260.438 | 36.8751627 | 128.085 | 0.604547327 | 0.005368 |
| 24733 | 39 expressed protein similar to hypothetical protein GB:AA071979                                                                                                                                                                                                            | At1g10820 | 182.862415 | 238.826  | 220.030407  | 275.344 | 22.7572786 | 90.837  | 0.605103944 | 0.005313 |
| 20760 | 38 haloacid dehalogenase-like hydrolase family protein low similarity to SPIP53078 SSM1 protein [Saccharomyces cerevisiae]; contains InterPro accession IPR005834: Haloacid dehalogenase-like hydrolase                                                                     | At5g59480 | 262.895204 | 346.488  | 346.183171  | 404.445 | 23.9676186 | 68.945  | 0.65410757  | 0.005293 |
| 23382 | 36 ankyrin repeat family protein contains ankyrin repeats, Pfam:PF00023                                                                                                                                                                                                     | At5g65860 | 185.876466 | 274.115  | 275.020482  | 404.686 | 38.4629572 | 97.739  | 0.587149377 | 0.005106 |
| 7061  | 11 pentapeptide (PPR) repeat-containing protein contains Pfam profile PF01535: PPR repeat                                                                                                                                                                                   | At5g37570 | 42.5111618 | 72.455   | 57.2462076  | 92.419  | 40.3901058 | 65.513  | 0.60166881  | 0.005096 |
| 15521 | 24 cysteine proteinase, putative / thiol protease, putative similar to cysteine proteinase RD21A precursor (thiol protease) GI:435619, SP:P43297 from [Arabidopsis thaliana]                                                                                                | At5g43060 | 79.0017228 | 120.664  | 164.34244   | 189.231 | 25.281054  | 105.357 | 0.58718741  | 0.005088 |
| 24986 | 39 C2 domain-containing protein similar to cold-regulated gene SRC2 [glycine max] GI:2055230; contains Pfam profile PF00168: C2 domain                                                                                                                                      | At3g05440 | 178.776654 | 203.739  | 194.783602  | 248.09  | 29.3966224 | 101.694 | 0.650560338 | 0.00507  |
| 26990 | 42 hypothetical protein similar to At2g04970, At2g15200, At1g32830, At2g14140, At4g03990, At5g34895, At3g47270, At2g02200                                                                                                                                                   | At3g30450 | 64.3368348 | 114.247  | 126.038042  | 140.773 | 20.8087755 | 79.606  | 0.573287793 | 0.00504  |
| 2363  | 4 high mobility group (HMG1/2) family protein similar to SPIP40618 High mobility group protein HMG2A (Gallus gallus); contains Pfam profile PF00505: HMG (high mobility group) box                                                                                          | At4g11080 | 103.325906 | 143.882  | 73.7327803  | 117.464 | 25.6439498 | 142.706 | 0.508510865 | 0.005031 |
| 18663 | 29 auxin-responsive AUX/IAA family protein similar to SPIQ38826 Auxin-responsive protein IAA8, SPIQ38827 Auxin-responsive protein IAA9 from Arabidopsis thaliana; contains Pfam profile: PF02309: AUX/IAA family                                                            | At4g29080 | 115.670895 | 162.14   | 105.110838  | 167.446 | 23.5366798 | 92.202  | 0.532134701 | 0.005016 |
| 25960 | 40 haloacid dehalogenase-like hydrolase family protein low similarity to SPIP53078 SSM1 protein [Saccharomyces cerevisiae]; contains InterPro accession IPR005834: Haloacid dehalogenase-like hydrolase                                                                     | At5g59480 | 129.180646 | 172.087  | 245.904996  | 346.369 | 25.5367306 | 80.417  | 0.59272513  | 0.00494  |
| 30011 | 47 mechanosensitive ion channel domain-containing protein / MS ion channel domain-containing protein contains Pfam profile PF00924: Mechanosensitive ion channel                                                                                                            | At1g53470 | 283.186035 | 401.892  | 269.716183  | 322.129 | 11.4394656 | 43.385  | 0.629186596 | 0.00494  |
| 22962 | 36 expressed protein                                                                                                                                                                                                                                                        | At2g24440 | 135.023713 | 208.671  | 137.717378  | 194.72  | 34.6984897 | 65.44   | 0.628192666 | 0.004872 |
| 2463  | 4 transducin family protein / WD-40 repeat family protein contains 3 WD-40 repeats (PF00400); similar to uncharacterized protein KIAA0007 (GI:1663708) [Homo sapiens] 1.2e-11                                                                                               | At5g11240 | 57.4263366 | 124.309  | 64.9995686  | 75.55   | 79.6638775 | 154.377 | 0.612783576 | 0.004805 |
| 21730 | 14 adenylylsulfate kinase, putative similar to adenylylsulfate kinase 1, chloroplast precursor (APS kinase, Adenosine-5-phosphosulfate kinase, ATP adenosine-5'-phosphosulfate 3'-phosphotransferase) [Arabidopsis thaliana] SWISS-PROT:Q43295                              | At3g03900 | 59.8842107 | 98.485   | 131.3237946 | 186.433 | 31.5946163 | 76.767  | 0.60441433  | 0.004416 |
| 22701 | 35 expressed protein contains Pfam profile PF04398: Protein of unknown function, DUF538                                                                                                                                                                                     | At5g54530 | 81.8564078 | 105.377  | 131.490523  | 180.974 | 22.4521162 | 75.119  | 0.600751477 | 0.004408 |
| 7058  | 11 Ca+2-binding EF hand family protein contains similarity to Ca+2-binding EF hand protein GI:2270994 from [Glycine max]                                                                                                                                                    | At5g29560 | 71.500021  | 95.781   | 46.5309213  | 85.886  | 38.8607801 | 71.917  | 0.608323939 | 0.004257 |
| 27038 | 42 F-box family protein contains Pfam:PF00646 F-box domain                                                                                                                                                                                                                  | At3g62230 | 91.6354954 | 122.597  | 85.6638674  | 95.638  | 25.281054  | 86.672  | 0.644949681 | 0.00392  |
| 20583 | 32 kinesin-like protein A (KATA)                                                                                                                                                                                                                                            | At4g21270 | 125.689566 | 174.488  | 121.14483   | 153.67  | 22.2933493 | 86.445  | 0.588856064 | 0.00384  |
| 14055 | 22 nodulin MtN21 family protein similar to MtN21 GI:2598575 (root nodule development) from [Medicago truncatula]                                                                                                                                                            | At4g08290 | 66.2096536 | 127.699  | 117.433892  | 156.295 | 60.848967  | 107.367 | 0.612193586 | 0.003726 |
| 7068  | 11 disease resistance protein (TIR-NBS-LRR class), putative domain signature TIR-NBS-LRR exists, suggestive of a disease resistance protein.                                                                                                                                | At5g38340 | 78.6380686 | 99.189   | 35.7789213  | 92.375  | 43.1928488 | 90.951  | 0.551678448 | 0.003696 |
| 23168 | 36 F-box family protein contains F-box domain Pfam:PF00646                                                                                                                                                                                                                  | At4g14096 | 100.558926 | 142.611  | 162.61205   | 209.609 | 77.0473162 | 166.633 | 0.647764085 | 0.003572 |
| 25933 | 40 basic helix-loop-helix (bHLH) family protein contains similarity to bHLH DNA-binding protein                                                                                                                                                                             | At5g46690 | 90.1241916 | 135.31   | 164.068382  | 279.85  | 32.8008325 | 65.418  | 0.58457834  | 0.0031   |
| 15639 | 25 expressed protein                                                                                                                                                                                                                                                        | At1g12180 | 90.9712918 | 119.688  | 88.5159836  | 114.194 | 26.1078791 | 81.118  | 0.619019271 | 0.003034 |
| 18015 | 28 dem protein-related / defective embryo and meristems protein-related identical to dem GI:2190419 from [Lycopersicon esculentum]                                                                                                                                          | At4g33400 | 69.6269411 | 108.459  | 75.077577   | 113.68  | 31.4131684 | 75.178  | 0.634881907 | 0.002944 |
| 2283  | 11 WD-40 repeat family protein / mitotic checkpoint protein, putative contains 5 WD-40 repeats (PF00400) (1 weak); similar to testis mitotic checkpoint protein BUB3 (GB:AA02849,SP O43684 ) [Homo sapiens]                                                                 | At3g19590 | 73.3447618 | 110.963  | 67.2462076  | 78.134  | 32.5101034 | 90.93   | 0.577520924 | 0.002904 |
| 3822  | 6 leucine-rich repeat transmembrane protein kinase, putative                                                                                                                                                                                                                | At5g43020 | 57.779295  | 91.091   | 88.6769131  | 118.423 | 31.153368  | 78.615  | 0.593313871 | 0.00285  |
| 25932 | 40 AWPM-19-like membrane family protein similar to AWPM-19 [Triticum aestivum] GI:1724112; contains Pfam profile PF05512: AWPM-19-like family                                                                                                                               | At5g46530 | 92.706136  | 118.248  | 169.696133  | 192.654 | 20.955171  | 72.565  | 0.65120304  | 0.002784 |
| 19862 | 31 leucine-rich repeat transmembrane protein kinase, putative receptor-like protein kinase (RKL1), Arabidopsis thaliana, EMBL:AF084034                                                                                                                                      | At3g50230 | 126.701381 | 143.361  | 97.389411   | 131.103 | 18.7303723 | 80.375  | 0.619892123 | 0.002728 |
| 24152 | 38 caldesmon-related weak similarity to Caldesmon (CDM) (Swiss-Prot:P12957) [Gallus gallus]                                                                                                                                                                                 | At1g52410 | 91.1606059 | 126.087  | 152.965843  | 179.606 | 4.73001695 | 34.048  | 0.571198046 | 0.002684 |
| 20682 | 32 calcium-dependent protein kinase 19 (CDPK19) identical to calcium-dependent protein kinase [Arabidopsis thaliana] gi 839642 gb AAA67655                                                                                                                                  | At5g19450 | 84.1025069 | 107.181  | 175.825793  | 205.765 | 18.309743  | 57.306  | 0.652894584 | 0.002684 |
| 24819 | 39 expressed protein contains Pfam domain, PF04678: Protein of unknown function, DUF607                                                                                                                                                                                     | At1g57610 | 103.99118  | 140.678  | 125.011917  | 141.322 | 13.1529111 | 66.203  | 0.607492968 | 0.002655 |
| 7094  | 11 expressed protein                                                                                                                                                                                                                                                        | At5g51180 | 34.1171758 | 85.291   | 35.0396018  | 78.703  | 38.3514888 | 75.338  | 0.451427053 | 0.002576 |
| 6607  | 11 ubiquitin family protein contains Pfam profile: PF00240 ubiquitin family                                                                                                                                                                                                 | At1g53930 | 48.1659908 | 92.07    | 38.2151702  | 59.955  | 30.367781  | 91.055  | 0.498017731 | 0.002508 |
| 16592 | 29 expressed protein                                                                                                                                                                                                                                                        | At3g09900 | 127.294993 | 186.843  | 132.612249  | 162.047 | 29.5698262 | 69.099  | 0.642528225 | 0.002394 |
| 27384 | 43 light stress-responsive one-helix protein (OHP2) contains similarity to photosystem II 22 kDa protein GI:6006279 from [Arabidopsis thaliana]                                                                                                                             | At1g34000 | 93.697014  | 103.751  | 82.219317   | 117.879 | 33.9404038 | 70.02   | 0.642892727 | 0.002334 |
| 27294 | 42 hypothetical protein / F-box domain Pfam:PF00646                                                                                                                                                                                                                         | At1g51500 | 83.607295  | 102.946  | 94.3190044  | 112.142 | 34.4031663 | 19.203  | 0.628412514 | 0.002322 |
| 6775  | 11 hypothetical protein                                                                                                                                                                                                                                                     | At3g02880 | 43.9401158 | 74.987   | 67.2210292  | 98.527  | 27.4151288 | 63.442  | 0.586477841 | 0.002268 |
| 3085  | 5 nucleotide-sugar transporter family protein similar to SPIQ77592 UDP N-acetylglucosamine transporter (Golgi) UDP-GlcNAc transporter (Canis familiaris), SPIP78382 CMP-sialic acid transporter (Homo sapiens); contains Pfam profile PF04142: Nucleotide-sugar transporter | At4g35335 | 71.5724826 | 99.48    | 56.9360167  | 96.265  | 43.1309915 | 94.654  | 0.587823515 | 0.00221  |
| 15868 | 25 hypothetical protein and genefinder; expression supported by MPSS                                                                                                                                                                                                        | At2g46640 | 51.6474444 | 99.8     | 69.6697097  | 81.175  | 53.2322788 | 99.154  | 0.637546574 | 0.002187 |
| 30564 | 48 zinc finger (C3HC4-type RING finger) family protein / BRCT domain-containing protein contains Pfam domain, PF00533: BRCA1 C Terminus (BRCT) domain                                                                                                                       | At1g04020 | 110.959435 | 158.139  | 140.351204  | 174.793 | 9.59900549 | 72.96   | 0.545210451 | 0.002162 |
| 6829  | 11 F-box family protein contains F-box domain Pfam:PF00646                                                                                                                                                                                                                  | At3g25750 | 57.734373  | 69.535   | 81.6661247  | 106.345 | 19.6025594 | 62.676  | 0.636996071 | 0.00216  |
| 30683 | 48 glycosyl transferase family 20 protein / trehalose-phosphatase family protein similar to SPIQ00764 Alpha, alpha-trehalose-phosphate synthase [UDP-forming] 56 kDa subunit (EC 2.4.                                                                                       |           |            |          |             |         |            |         |             |          |

|       |                                                                                                                                                                                                                                                                            |           |            |          |            |          |            |         |             |          |
|-------|----------------------------------------------------------------------------------------------------------------------------------------------------------------------------------------------------------------------------------------------------------------------------|-----------|------------|----------|------------|----------|------------|---------|-------------|----------|
| 19572 | 31 phosphoribulokinase/uridine kinase family protein weak similarity to SP Q59190 Uridine kinase (EC 2.7.1.48) (Uridine monophosphokinase) (Cytidine monophosphokinase) (Borrelia burgdorferi); contains Pfam profile PF00485: Phosphoribulokinase / Uridine kinase family | At1g26190 | 130.854525 | 221.497  | 50.9891454 | 99.945   | 28.3223683 | 64.703  | 0.512891409 | 0.000473 |
| 1322  | 3 jacalin lectin family protein similar to gi:6503088 (GB:AAF4583) from [Arabidopsis thaliana] [Proc. Natl. Acad. Sci. U.S.A. 97 (1), 489-494 (2000)]; contains Pfam profile PF01419 jacalin-like lectin domain                                                            | At1g05770 | 65.7957296 | 75.463   | 57.2367138 | 111.566  | 80.1937878 | 151.905 | 0.637614881 | 0.000468 |
| 22249 | 35 sugar transporter family protein contains Pfam profile: PF00083 sugar (and other) transporter                                                                                                                                                                           | At1g73220 | 50.2816023 | 79.005   | 53.4445147 | 87.116   | 15.6601913 | 25.396  | 0.622187518 | 0.000442 |
| 30183 | 47 sugar transporter family protein similar to sugar-porter family proteins 1 and 2 [Arabidopsis thaliana] GI:14585699, GI:14585701; contains Pfam profile PF00083: major facilitator superfamily protein                                                                  | At3g05150 | 97.0806814 | 134.96   | 50.9190375 | 83.503   | 42.2258139 | 105.971 | 0.575860655 | 0.00044  |
| 22590 | 35 expressed protein : expression supported by MPSS                                                                                                                                                                                                                        | At4g39190 | 1331.23277 | 1890.812 | 74.6346226 | 120.965  | 42.1495233 | 83.424  | 0.608764655 | 0.000416 |
| 24146 | 38 endo-1,4-beta-glucanase, putative / cellulase, putative similar to endo-beta-1,4-glucanase GI:4972236 from [Fragaria x ananassa]                                                                                                                                        | At1g48930 | 61.5837559 | 90.776   | 118.891818 | 153.895  | 24.3800002 | 63.877  | 0.610879035 | 0.000396 |
| 20076 | 31 myb family transcription factor contains Pfam profile: PF00249 Myb DNA binding domain                                                                                                                                                                                   | At5g41020 | 60.0767335 | 84.099   | 69.029213  | 119.892  | 43.2402727 | 97.542  | 0.577983081 | 0.000396 |
| 14607 | 23 phosphoesterase identical to phosphoesterase [Arabidopsis thaliana] GI:21630064; contains Pfam profile PF00645: Poly(ADP-ribose) polymerase and DNA-Ligase Zn-finger region                                                                                             | At3g14890 | 66.1486881 | 93.211   | 75.214606  | 90.754   | 13.1013634 | 59.825  | 0.58581162  | 0.00039  |
| 6941  | 11 WD-40 repeat family protein contains 6 WD-40 repeats (PF00400); similar to fizzy-related protein (GI:5813253) Drosophila melanogaster, PID:gd236419;                                                                                                                    | At4g22310 | 31.3232807 | 63.204   | 39.992127  | 63.22586 | 17.14241   | 69.812  | 0.5003384   | 0.000384 |
| 17856 | 28 expressed protein                                                                                                                                                                                                                                                       | At3g16330 | 46.3883638 | 69.609   | 59.5040065 | 92.001   | 46.8609831 | 84.856  | 0.621810285 | 0.000378 |
| 6790  | 11 protein phosphatase 2C family protein / PP2C family protein similar to protein phosphatase-2c (GI:3680412) [Mesembryanthemum crystallinum]; contains Pfam PF00481 : Protein phosphatase 2C domain                                                                       | At3g09400 | 46.3498593 | 63.417   | 29.1186723 | 76.937   | 24.4480432 | 51.104  | 0.529248812 | 0.000368 |
| 21360 | 33 hypothetical protein                                                                                                                                                                                                                                                    | At5g32070 | 188.998544 | 268.017  | 153.035951 | 209.812  | 37.4360016 | 90.756  | 0.615686657 | 0.000336 |
| 6341  | 10 serine/threonine protein kinase, putative similar to serine-threonine protein kinase [Triticum aestivum] gi 2055374 gb AAB58348                                                                                                                                         | At4g40010 | 19.8758379 | 60.797   | 57.6286806 | 81.769   | 11.161108  | 49.549  | 0.418983166 | 0.000322 |
| 18281 | 29 late embryogenesis abundant group 1 domain-containing protein / LEA group 1 domain-containing protein contains Pfam domain, PF03760: Late embryogenesis abundant (LEA) group 1                                                                                          | At1g32560 | 78.8402176 | 108.119  | 106.16883  | 157.665  | 27.7285388 | 64.873  | 0.61000298  | 0.000312 |
| 28299 | 44 SIT4 phosphatase-associated family protein contains Pfam profile: PF04499 SIT4 phosphatase-associated protein                                                                                                                                                           | At3g45190 | 37.1611748 | 64.892   | 46.07522   | 78.24    | 48.5599553 | 80.562  | 0.588107786 | 0.0003   |
| 19528 | 31 LOB domain protein 1 / lateral organ boundaries domain protein 1 (LBD1) identical to SP Q9LQR0 LOB domain protein 1 (Arabidopsis thaliana)                                                                                                                              | At1g07900 | 79.0092098 | 90.462   | 103.914224 | 148.447  | 24.4315479 | 70.164  | 0.640537303 | 0.00028  |
| 23331 | 36 NLI interacting factor (NIF) family protein contains Pfam profile PF03031: NLI interacting factor                                                                                                                                                                       | At5g45700 | 85.1752866 | 180.082  | 78.2451786 | 184.547  | 51.0734612 | 222.721 | 0.375427182 | 0.00027  |
| 3015  | 5 beta-fructofuranosidase, putative / invertase, putative / saccharase, putative / beta-fructofuranosidase, putative similar to neutral invertase [Daucus carota] GI:4200165; contains Pfam profile PF04853: Plant neutral invertase                                       | At4g09510 | 120.682905 | 134.51   | 55.4505562 | 88.842   | 14.0560268 | 69.735  | 0.574305133 | 0.000261 |
| 10020 | 16 vacuolar ATP synthase subunit G 1 (VATG1) / V-ATPase G subunit 1 (VAG1) / vacuolar proton pump G subunit 1 (VMA10) identical to SWISS-PROT:O62628 vacuolar ATP synthase subunit G 1 (V-ATPase G subunit 1, Vacuolar proton pump G subunit 1) [Arabidopsis thaliana]     | At3g01390 | 42.6191956 | 63.733   | 20.5289631 | 67.786   | 40.8649547 | 96.573  | 0.464904662 | 0.00026  |
| 17209 | 27 DNA-binding protein similar to viroid symptom modulation protein [Lycopersicon esculentum] gi 72777 gb AAF66537                                                                                                                                                         | At3g12890 | 43.7398669 | 94.823   | 73.157577  | 122.736  | 14.4456942 | 76.076  | 0.417433352 | 0.000258 |
| 10311 | 16 pollen specific phosphatase, putative / phosphatase and tensin, putative (PTEN1) identical to phosphatase and tensin homolog [Arabidopsis thaliana] GI:21535746                                                                                                         | At5g39400 | 35.8819679 | 51.163   | 68.0795354 | 79.868   | 31.3286302 | 100.918 | 0.621387894 | 0.00024  |
| 2942  | 5 pentatricopeptide (PPR) repeat-containing protein contains Pfam profile PF01535: PPR repeat                                                                                                                                                                              | At3g28660 | 108.85131  | 136.284  | 39.8929794 | 65.025   | 20.7860945 | 53.569  | 0.600078753 | 0.00021  |
| 10207 | 16 expressed protein                                                                                                                                                                                                                                                       | At4g31010 | 41.050135  | 46.043   | 45.1893113 | 67.592   | 15.5674054 | 51.527  | 0.620747401 | 0.000208 |
| 21355 | 33 SSXT protein-related / glycine-rich protein contains weak hit to Pfam profile PF05030: SSXT protein (N-terminal region)                                                                                                                                                 | At5g28640 | 96.622905  | 220.242  | 100.915519 | 160.835  | 37.1432107 | 113.959 | 0.4640316   | 0.000204 |
| 31148 | 48 seed maturation family protein similar to SP P09444 Late embryogenesis abundant protein D-34 (LEA D-34) (Gossypium hirsutum); contains Pfam profile PF04927: Seed maturation protein                                                                                    | At5g53270 | 44.8567382 | 70.279   | 195.424133 | 226.64   | 37.6958021 | 87.878  | 0.643163137 | 0.000201 |
| 18615 | 29 glycosyltransferase family protein contains Pfam profile: PF00201 UDP-glucuronosyl and UDP-glucosyl transferase                                                                                                                                                         | At4g09500 | 68.6589712 | 110.189  | 67.8915188 | 95.391   | 14.9117187 | 34.444  | 0.589248866 | 0.0002   |
| 24353 | 38 protein kinase family protein contains protein kinase domain, Pfam:PF00069                                                                                                                                                                                              | At3g14370 | 39.0970983 | 89.679   | 112.425959 | 129.639  | 36.5328859 | 58.28   | 0.6433472   | 0.000188 |
| 1744  | 3 protein kinase family protein contains Pfam domain, PF00069: Protein kinase domain                                                                                                                                                                                       | At4g23210 | 88.1893377 | 111.423  | 89.9611621 | 122.058  | 30.8255246 | 90.264  | 0.623340871 | 0.000177 |
| 23535 | 36 expressed protein                                                                                                                                                                                                                                                       | At5g55540 | 88.2588598 | 111.602  | 98.5382243 | 113.137  | 24.2872143 | 86.168  | 0.647886141 | 0.000174 |
| 23279 | 19 expressed protein similar to p53 inducible protein [Homo sapiens] GI:5616320                                                                                                                                                                                            | At5g18410 | 35.3581832 | 108.986  | 111.164017 | 138.419  | 5.36714852 | 63.209  | 0.554969711 | 0.000168 |
| 30523 | 47 regulator of chromosome condensation (RCC1) family protein similar to UVB-resistance protein UVR8 [Arabidopsis thaliana] GI:5478530; contains Pfam profile PF00415: Regulator of chromosome condensation (RCC1)                                                         | At5g68070 | 56.2262774 | 71.086   | 60.978757  | 84.985   | 2.5590816  | 57.944  | 0.697270284 | 0.00016  |
| 4404  | 7 lectin protein kinase family protein contains Pfam domains, PF00138: Legume lectins beta domain and PF00069: Protein kinase domain                                                                                                                                       | At5g03140 | 75.5512867 | 100.48   | 64.4989591 | 94.557   | 90.455904  | 192.138 | 0.634762607 | 0.000161 |
| 5249  | 9 actin-related protein 4 (ARP4) nearby identical to actin-related protein 4 (ARP4) [Arabidopsis thaliana] GI:21427463; contains Pfam profile PF00022: Actin; supporting cDNA gi 21427462 gb AF507912.1                                                                    | At1g18450 | 211.737623 | 239.18   | 53.5162159 | 89.589   | 37.2174394 | 99.917  | 0.618366946 | 0.000142 |
| 7043  | 11 harpin-induced family protein / HIN1 family protein / harpin-responsive family protein similar to harpin-induced protein hin1 ( GI:1619321) [Nicotiana tabacum]                                                                                                         | At5g22200 | 34.0005925 | 65.473   | 28.6964316 | 47.536   | 37.9349834 | 53.296  | 0.611588048 | 0.00013  |
| 10352 | 16 expressed protein                                                                                                                                                                                                                                                       | At5g56250 | 29.7971785 | 57.733   | 39.9248466 | 74.238   | 29.4667272 | 64.974  | 0.502477116 | 0.000126 |
| 5273  | 9 acetyltransferase-related low similarity to O-acetyltransferase [Cryptococcus neoformans var. neoformans] GI:17063556                                                                                                                                                    | At1g29890 | 158.145698 | 231.217  | 43.8317677 | 60.066   | 54.4096283 | 97.708  | 0.656852387 | 0.000126 |
| 23003 | 36 basic helix-loop-helix (bHLH) family protein contains Pfam profile: PF00010 helix-loop-helix DNA-binding domain                                                                                                                                                         | At2g41130 | 70.8612179 | 110.931  | 64.714357  | 150.526  | 14.208608  | 39.935  | 0.474833751 | 0.000114 |
| 6506  | 11 D-3-phosphoglycerate dehydrogenase / 3-PGDH identical to SP O04130                                                                                                                                                                                                      | At1g17745 | 48.9382211 | 57.754   | 33.6772781 | 64.38    | 19.656169  | 33.029  | 0.655192149 | 0.00011  |
| 27740 | 43 pentatricopeptide (PPR) repeat-containing protein contains Pfam profile PF01535: PPR repeat                                                                                                                                                                             | At4g20090 | 29.8923703 | 62.525   | 39.9583072 | 69.227   | 187.80889  | 229.648 | 0.657067968 | 0.000114 |
| 19519 | 31 ribonuclease P family protein / Rpp14 family protein contains Pfam profile: PF01900 Rpp14 family                                                                                                                                                                        | At1g04635 | 91.6900435 | 110.938  | 43.6596848 | 116.766  | 39.2051187 | 68.195  | 0.591767617 | 0.000112 |
| 30349 | 47 DNA-binding protein-related contains Pfam domain PF03479: Domain of unknown function (DUF296), found in AT-hook motifs Pfam:PF02178                                                                                                                                     | At4g25320 | 109.070572 | 194.864  | 53.538582  | 67.863   | 21.9139582 | 69.541  | 0.554781742 | 0.000111 |
| 1623  | 3 expressed protein                                                                                                                                                                                                                                                        | At3g22415 | 65.2224396 | 98.927   | 37.7499088 | 87.185   | 24.2934001 | 114.724 | 0.434686004 | 0.000106 |
| 11940 | 19 expressed protein contains Pfam profile: PF05097 protein of unknown function (DUF688)                                                                                                                                                                                   | At2g34170 | 73.1800478 | 88.422   | 41.2776101 | 97.169   | 23.9098852 | 84.845  | 0.511410509 | 0.000105 |
| 6514  | 11 glycoside hydrolase family 28 protein / polygalacturonase (pectinase) family protein similar to polygalacturonase PG1 GI:5669846, PG2 GI:5669848 from (Glycine max); contains PF00295: Glycosyl hydrolases family 28 (polygalacturonases)                               | At1g02460 | 38.172989  | 48.435   | 63.2245645 | 96.482   | 20.2025746 | 52.579  | 0.609220008 | 0.000104 |
| 20009 | 31 expressed protein similar to unknown protein (sp G3E2E8)                                                                                                                                                                                                                | At5g06180 | 55.632666  | 80.142   | 69.860913  | 89.787   | 13.1632207 | 61.169  | 0.652481427 | 0.000102 |
| 13899 | 22 apurinic endonuclease-redox protein / DNA-(apurinic or apyrimidinic site) lyase identical to apurinic endonuclease-redox protein SP: P45951 from [Arabidopsis thaliana]                                                                                                 | At2g41460 | 70.1210748 | 103.539  | 65.4664234 | 83.227   | 25.4109542 | 99.42   | 0.573145291 | 0.0001   |
| 6581  | 11 protein kinase family protein contains Pfam domain, PF00069: Protein kinase domain                                                                                                                                                                                      | At1g33770 | 26.5863263 | 56.038   | 32.8710374 | 70.314   | 13.1920874 | 51.652  | 0.39910878  | 0.000099 |
| 30888 | 48 hypothetical protein                                                                                                                                                                                                                                                    | At3g32394 | 51.5779223 | 97.756   | 50.2869599 | 102.97   | 15.8931869 | 35.019  | 0.489951683 | 0.000084 |
| 12078 | 19 leucine-rich repeat transmembrane protein kinase, putative several receptor-like protein kinases                                                                                                                                                                        | At3g57830 | 77.9781433 | 114.894  | 33.231137  | 85.009   | 19.7798834 | 50.622  | 0.486782152 | 0.00008  |
| 15592 | 24 clathrin adaptor complex medium subunit family protein contains Pfam profile: PF00928 adaptor complexes medium subunit family                                                                                                                                           | At4g24550 | 65.2716398 | 99.627   | 114.591326 | 139.145  | 38.3370554 | 79.929  | 0.652779345 | 0.00008  |
| 28377 | 44 farnesyl pyrophosphate synthetase 2 (FPS2) / FPP synthetase 2 / farnesyl diphosphate synthase 2 identical to SP Q43315 Farnesyl pyrophosphate synthetase 2 (FPP synthetase 2) [Includes: Dimethylallyltransferase (EC 2.5.1.1); Geranyltransferase (EC 2.5.1.10)] [Ara  | At4g17190 | 73.4453014 | 94.746   | 48.8514856 | 80.395   | 16.8828976 | 68.491  | 0.546280298 | 0.000078 |
| 58170 | 10 VHS domain-containing protein / GAT domain-containing protein weak similarity to SP Q9LYJ5 ADP-ribosylation factor binding protein GGA1 [Homo sapiens]; contains Pfam profiles PF00790: VHS domain, PF03127: GAT domain                                                 | At1g06210 | 62.9153749 | 76.81    | 41.4241993 | 47.711   | 5.68874226 | 63.544  | 0.595438212 | 0.000076 |
| 12000 | 19 protein kinase, putative similar to viroid symptom modulation protein [Lycopersicon esculentum] gi 767277 gb AAF66637                                                                                                                                                   | At3g12890 | 47.3862736 | 67.247   | 67.2127471 | 80.6     | 29.4131176 | 70.331  | 0.652258316 | 0.000075 |
| 13443 | 21 hypothetical protein                                                                                                                                                                                                                                                    | At4g22217 | 29.683804  | 75.308   | 82.1648467 | 96.119   | 11.4683323 | 52.967  | 0.488502661 | 0.000074 |
| 3008  | 5 Ulp1 protease family protein contains Pfam profile PF02902: Ulp1 protease family, C-terminal catalytic domain; similar to At1g32840, At2g06430, At2g15140, At2g04980, At2g14130, At3g44500, At2g15190, At3g47260, At5g34900, At3g29210, At2g02210, At3g32900             | At4g04010 | 50.1746452 | 69.215   | 65.2403652 | 53.166   | 46.4176729 | 89.105  | 0.636226265 | 0.000072 |
| 8800  | 14 calcineurin-like phosphoesterase family protein contains Pfam profile: PF00149 calcineurin-like phosphoesterase                                                                                                                                                         | At3g46120 | 90.5691331 | 141.307  | 69.4386724 | 90.957   | 56.3498837 | 101.341 | 0.653468047 | 0.000068 |
| 19997 | 31 expressed protein                                                                                                                                                                                                                                                       | At5g02440 | 63.8619453 | 84.574   | 55.1701246 | 121.273  | 31.376054  | 92.771  | 0.516078719 | 0.000066 |
| 6666  | 11 eukaryotic translation initiation factor 2 family protein / eIF-2 family protein similar to SP O60841 Translation initiation factor IF-2 (Homo sapiens); contains Pfam profile PF00009: Elongation factor Tu GTP binding domain                                         | At1g76825 | 28.7607642 | 59.523   | 15.3823071 | 62.245   | 31.1904823 | 52.847  | 0.440172018 | 0.000063 |
| 28485 | 44 speckle-type POZ protein-related contains Pfam PF00651 : BTB/POZ domain; contains Pfam PF00917: MATH domain; similar to Speckle-type POZ protein (SP:O43791) [Homo sapiens]                                                                                             | At5g19000 | 148.907814 | 213.247  | 63.866689  | 91.439   | 12.8992964 | 31.552  | 0.601858931 | 0.000059 |
| 3236  | 5 disease resistance protein (CC-NBS-LRR class), putative domain signature CC-NBS-LRR exists, suggestive of a disease resistance protein.                                                                                                                                  | At5g66910 | 68.2396994 | 89.164   | 64.4004649 | 74.647   | 14.8560071 | 47.941  | 0.645981093 | 0.000056 |
| 5816  | 9 peroxidase, putative similar to peroxidase [Nicotiana tabacum] gi 5381253 dbj BAAB2306                                                                                                                                                                                   | At5g58590 | 68.2450472 | 105.839  | 75.7611288 | 86.533   | 19.0437823 | 84.081  | 0.582270348 | 0.000054 |
| 11    | hypothetical protein                                                                                                                                                                                                                                                       | At5g36500 | 33.2946757 | 52.715   | 14.637013  | 48.255   | 18.2234018 | 91.187  | 0.415727237 | 0.000053 |
| 21539 | 34 F-box family protein similar to hypothetical protein GB:AA22295 GI:4544395 from [Arabidopsis thaliana]                                                                                                                                                                  | At1g74300 | 37.8403524 | 56.732   | 67.0190869 | 78.547   | 17.7303469 | 50.378  | 0.626958925 | 0.000052 |
| 1580  | 3 no apical meristem (NAM) family protein similar to NAC2 (GI:6456751) (Arabidopsis thaliana)                                                                                                                                                                              | At3g03200 | 43.0705546 | 78.03    | 21.578888  | 149.716  | 26.938828  | 36.168  | 0.480310457 | 0.000048 |

12055 19 expressed protein  
 15696 25 F-box protein-related contains weak hit to Pfam PF00646: F-box domain; contains weak hit to TIGRFAM TIGR01640 : F-box protein interaction domain  
 24163 38 SWIM zinc finger family protein contains Pfam domain PF04434: SWIM zinc finger  
 19868 31 AAA-type ATPase family protein contains Pfam profile: ATPase family PF00004  
 24579 38 heavy-metal-associated domain-containing protein contains Pfam heavy-metal-associated domain PF00403: glycine-rich protein GRP22, rape, PIR:S31415; isoform contains a non-consensus TG-acceptor splice site at intron 3  
 22198 35 C2 domain-containing protein low similarity to CLB1 [Lycopersicon esculentum] GI:2789434; contains Pfam profile PF00168: C2 domain  
 28287 44 myosin heavy chain-related similar to Myosin heavy chain, non-muscle (Zipper protein) (Myosin II)(SP:Q99323) [Drosophila melanogaster]  
 20290 32 expressed protein contains Pfam profile: PF04842 plant protein of unknown function (DUF639)  
 6846 11 hypothetical protein  
 3173 5 nitrate-responsive NOI protein, putative similar to nitrate-induced NOI protein [Zea mays] GI:2642213  
 7240 12 endonuclease/exonuclease/phosphatase family protein similar to SPIP32019 Type II inositol-1,4,5-trisphosphate 5-phosphatase precursor (EC 3.1.3.56) (Homo sapiens); contains Pfam profile PF03372: Endonuclease/Exonuclease/phosphatase family  
 21813 34 serine carboxypeptidase S10 family protein similar to SPIP52711 Serine carboxypeptidase II-3 precursor (EC 3.4.16.6) Hordeum vulgare; contains Pfam profile PF0450 serine carboxypeptidase  
 5047 8 expressed protein  
 15081 24 hypothetical protein hypothetical protein  
 23131 36 DC1 domain-containing protein contains Pfam profile PF03107: DC1 domain

|           |            |        |            |         |            |        |             |          |
|-----------|------------|--------|------------|---------|------------|--------|-------------|----------|
| At3g47720 | 15.5975539 | 32.185 | 23.4463071 | 71.655  | 18.9674917 | 60.802 | 0.374595981 | 0.000001 |
| At1g46984 | 13.8691272 | 58.055 | 14.0231702 | 39.462  | 16.8829027 | 29.042 | 0.39186077  | 0.000001 |
| At1g60560 | 30.9555239 | 59.674 | 47.8645644 | 70.278  | 8.46413234 | 47.269 | 0.45962721  | 0.000001 |
| At3g50930 | 37.7002386 | 55.134 | 36.1995686 | 76.83   | 11.5961706 | 42.261 | 0.476450517 | 0.000001 |
| At5g19090 | 22.777584  | 40.335 | 45.6545727 | 56.602  | 7.50328321 | 42.525 | 0.515914531 | 0.000001 |
| At1g50260 | 39.0404111 | 54.587 | 31.7604648 | 64.137  | 16.6767119 | 47.494 | 0.520508795 | 0.000001 |
| At3g30230 | 24.7295511 | 53.068 | 69.0690126 | 122.056 | 8.12185561 | 12.918 | 0.55353368  | 0.000001 |
| At1g71240 | 35.6990713 | 58.498 | 31.0609793 | 68.931  | 25.1800205 | 41.874 | 0.55406647  | 0.000001 |
| At3g43950 | 18.8693716 | 21.306 | 4.16028557 | 32.622  | 6.78161541 | 10.436 | 0.554331652 | 0.000001 |
| At5g40845 | 44.1829084 | 49.373 | 19.8150374 | 43.344  | 14.1611841 | 43.452 | 0.559313869 | 0.000001 |
| At1g47510 | 31.7833718 | 52.203 | 47.9872532 | 64.656  | 26.0130313 | 73.073 | 0.569007374 | 0.000001 |
| At3g52020 | 25.0889269 | 38.353 | 22.0505229 | 79.81   | 17.7468422 | 22.203 | 0.576581715 | 0.000001 |
| At5g05020 | 39.9923293 | 45.788 | 40.2674192 | 67.749  | 27.7862722 | 63.65  | 0.634777835 | 0.000001 |
| At1g67855 | 28.4484495 | 56.915 | 56.3157512 | 62.594  | 22.2871636 | 39.1   | 0.656514679 | 0.000001 |
| At3g59130 | 51.2335205 | 63.632 | 41.1469545 | 48.072  | 20.1819555 | 64.2   | 0.658486123 | 0.000001 |
